# Supplementary material for: Asparagus cochinchinensis alleviates disturbances of lipid metabolism and gut microbiota in high-fat diet-induced obesity mice
Source: Front Pharmacol. 2022 Oct 12;13:1015005. doi: 10.3389/fphar.2022.1015005 (PMC9616603; doi:10.3389/fphar.2022.1015005)
Supplement: Supplementary file 1 [file Table2.XLSX]

## Sheet: Sheet1
Title	RT (min)	Precursor m/z	Height	Area	Adduct	Reference m/z	Formula	Ontology	InChIKey	SMILES	Total score	MS1 isotopes	MSMS spectrum
6,7-DIHYDROXYCOUMARIN	3.60755	177.019	96091.1	4712830	[M-H]-	177.019	C9H6O4	6,7-dihydroxycoumarins	ILEDWLMCKZNDJK-UHFFFAOYSA-N	OC1=CC2=C(C=CC(=O)O2)C=C1O	85.6	176.77132:41 176.88773:18 176.8896:18 176.90274:18 176.95909:18 176.96284:18 176.97787:40 176.97975:18 176.99103:39 176.99478:42 176.99666:18 176.99854:166 177.00041:20 177.00229:62 177.00418:146 177.00606:124 177.00793:195 177.00981:426 177.01169:1920 177.01357:4326 177.01544:11125 177.01732:18857 177.01921:23263 177.02109:18079 177.02296:10517 177.02484:5894 177.02672:3105 177.02859:1988 177.03…	105.03137:5 105.03282:5 109.03988:5 121.02907:5 133.0255:5 133.02711:5 133.02875:5 133.12975:5 134.03226:5 134.04042:5 137.7175:5 149.02484:5 149.02657:5 149.03519:5 177.01245:5 177.01433:5 177.0162:5 177.01808:10 177.01997:31 177.02185:5 177.02373:5 177.0256:5 177.02936:5 177.04626:5
(E)-5-hydroxy-N-[3-[5-[3-[[(E)-5-hydroxy-3-methylpent-2-enoyl]amino]propyl]-3,6-dioxopiperazin-2-yl]propyl]-3-methylpent-2-enamide	5.22398	451.218	146620	2376475	[M-H]-	451.257	C22H36N4O6		CNQCBOHTKBVCFM-WXUKJITCSA-N	OC(=NCCCC1N=C(O)C(N=C1O)CCCN=C(O)C=C(C)CCO)C=C(C)CCO	66.3	451.00461:30 451.0166:30 451.02557:30 451.02859:30 451.04059:30 451.04657:60 451.05557:60 451.05856:30 451.06458:90 451.06757:120 451.07657:30 451.08557:60 451.08856:90 451.09155:120 451.09454:30 451.10056:150 451.10956:30 451.11255:30 451.11554:60 451.11856:60 451.12155:90 451.12454:60 451.12753:120 451.13055:150 451.13354:210 451.13654:180 451.13956:150 451.14255:150 451.14853:30 451.15155:120 …	101.023:20 101.0301:10 101.03294:10 102.18016:10 113.01865:10 113.02466:10 113.02616:10 113.03217:10 115.0422:20 115.92383:10 119.02911:10 119.03219:10 119.03373:10 119.03527:20 119.03681:31 119.03989:10 119.04452:10 119.04605:10 119.04759:10 119.84855:10 123.0808:10 127.10477:10 131.03662:10 131.03986:10 133.10564:10 134.03749:10 148.9976:10 149.00623:10 149.05966:10 151.08182:10 151.10785:10 15…
L-5-Oxoproline	1.62352	128.036	80264.2	1.50244e+06	[M-H]-	128.035	C5H7NO3	Alpha amino acids and derivatives	ODHCTXKNWHHXJC-VKHMYHEASA-N	OC(=O)[C@@H]1CCC(O)=N1	85.9	127.61749:25 127.62068:74 127.62228:49 127.62387:25 127.62547:25 127.62707:25 127.63504:99 127.64461:25 127.66376:25 127.74354:25 127.74832:25 127.79142:25 127.83292:25 127.8457:58 127.85527:25 127.85847:25 127.87283:25 127.92873:25 127.93352:56 128.01019:25 128.01338:58 128.01817:29 128.01978:29 128.02296:29 128.02457:66 128.02617:95 128.02776:181 128.02936:989 128.03096:4068 128.03256:9999 128.…	128.03003:10 1489.27124:10
D-(+)-Malic acid	1.62352	133.014	68070.8	1.46102e+06	[M-H]-	133.014	C4H6O5	Beta hydroxy acids and derivatives	BJEPYKJPYRNKOW-UWTATZPHSA-N	O[C@H](CC(O)=O)C(O)=O	68.7	132.53542:25 132.55005:25 132.55167:25 132.5793:49 132.58093:74 132.58418:25 132.58582:49 132.58907:25 132.59232:49 132.59718:49 132.60695:25 132.6102:49 132.61995:25 132.62646:25 132.62808:25 132.62971:25 132.65248:25 132.71753:49 132.72079:25 132.75821:25 132.78424:25 132.84282:25 132.8542:25 132.85909:25 132.88513:25 132.89653:54 132.92746:25 132.93398:25 132.94048:56 132.98119:52 132.99583:56…	114.99798:10 115.00253:31 133.00758:10
5,7-dihydroxy-2-(3-hydroxy-4-methoxyphenyl)-2,3-dihydrochromen-4-one	7.90567	301.072	47783.4	1.06981e+06	[M-H]-	301.072	C16H14O6		AIONOLUJZLIMTK-UHFFFAOYSA-N	O=C1C=2C(O)=CC(O)=CC2OC(C3=CC=C(OC)C(O)=C3)C1	82.8	300.92743:49 300.96173:49 300.97888:98 300.98132:49 300.98376:295 300.98624:788 300.98868:542 300.99112:345 300.99356:295 300.99603:49 300.99847:248 301.00092:98 301.00336:49 301.00583:101 301.00827:98 301.01071:49 301.01318:101 301.01562:100 301.01807:49 301.02051:100 301.04257:100 301.04993:49 301.05237:301 301.05481:552 301.05728:452 301.05972:705 301.06216:1769 301.06461:4225 301.06708:5723 3…	106.67591:10 125.02436:10 125.03068:10 125.03384:10 132.61865:10 134.04533:10 136.0127:10 151.00166:20 151.0034:10 151.00514:10 163.99741:10 164.00464:10 164.00826:10 164.01006:10 164.01187:10 164.01549:10 164.01729:10 164.02272:10 164.31763:10 199.04555:10 200.04288:10 201.0287:10 201.0307:10 217.05016:10 228.32904:10 229.23035:10 241.06511:10 242.05489:10 242.05928:10 242.06367:10 242.07466:10 …
Furostane base -2H + O-Hex, O-Hex-dHex-dHex	6.99733	1031.51	33642.4	1.00559e+06	[M-H2O+H]+	1031.54	C51H84O22	Steroidal saponins	LVTJOONKWUXEFR-UHFFFAOYNA-N	OCC9OC(OCC(C)CCC7(O)(OC6CC5C8CC=C4CC(OC3OC(CO)C(OC1OC(C)C(O)C(O)C1(O))C(O)C3(OC2OC(C)C(O)C(O)C2(O)))CCC4(C)C8(CCC5(C)C6C7(C))))C(O)C(O)C9(O)	87.3	1031.01379:7 1031.02734:7 1031.11804:7 1031.13159:7 1031.17249:16 1031.30847:7 1031.31299:7 1031.3175:7 1031.32654:7 1031.34021:7 1031.34924:7 1031.36279:7 1031.36743:24 1031.37195:7 1031.37646:7 1031.3855:7 1031.4082:7 1031.42627:15 1031.43542:7 1031.43994:22 1031.44446:7 1031.44897:7 1031.45349:16 1031.46265:36 1031.46716:118 1031.47168:116 1031.4762:338 1031.48071:514 1031.48523:1076 1031.4897…	101.02137:1 101.05544:1 101.05685:1 101.06111:1 101.06537:1 101.06963:1 101.22297:1 101.6595:1 102.04278:1 102.33677:1 103.00482:1 103.02918:1 103.03205:1 103.03349:1 103.03492:2 103.03635:1 103.03778:2 103.03922:1 103.04065:1 103.04208:2 103.04352:1 103.04494:1 103.04638:1 103.04781:1 103.24998:1 103.37914:1 103.78001:1 103.90518:1 104.30563:1 105.06399:1 105.06544:2 105.06688:1 105.06833:2 105.…
Flavanone base + 3O	7.46787	271.061	92242.8	972778	[M-H]-	271.06	C15H12O5	Flavanone O-glycosides	FTVWIRXFELQLPI-UHFFFAOYNA-N	O=C2C3=C(O)C=C(O)C=C3(OC(C1=CC=C(O)C=C1)C2)	82.1	270.73538:68 270.74466:68 270.75165:68 270.8353:136 270.8562:68 270.91663:68 270.92126:68 270.92361:68 270.93057:68 270.9422:213 270.96078:68 270.96542:68 270.96777:68 270.97473:136 270.97937:363 270.98404:136 270.98636:68 270.99567:136 271.00726:68 271.01193:145 271.01657:142 271.02121:145 271.02588:68 271.03052:141 271.03284:304 271.03516:385 271.03751:308 271.03983:635 271.04214:909 271.04446:…	106.99995:10 107.00725:10 107.00871:20 107.01017:10 107.01163:10 107.01309:20 107.01601:41 107.01747:20 107.01894:10 107.02478:10 108.0175:10 108.99123:10 108.9927:10 110.3858:10 116.03606:10 117.04061:10 119.04421:20 119.04575:41 119.04729:61 119.04884:82 119.05038:71 119.05192:92 119.05346:20 119.055:41 119.05654:10 119.05808:10 119.05962:20 119.06425:10 119.06733:10 119.07349:10 119.41426:10 1…
LPE 18:2	10.8853	476.278	66273	795603	[M-H]-	476.276	C23H44NO7P	Lipids	DBHKHNGBVGWQJE-UHFFFAOYNA-N	O=C(OCC(O)COP(=O)(O)OCCN)CCCCCCCC=CCC=CCCCCC	90	475.78204:26 475.78821:26 475.79129:26 475.80362:26 475.84366:26 475.84674:26 475.84982:26 475.87753:26 475.88062:77 475.88678:26 475.96378:26 475.96686:26 475.96994:51 475.97302:77 475.98227:51 475.98535:128 475.98843:77 475.99152:26 475.9946:51 475.99768:26 476.00076:26 476.00693:51 476.01306:51 476.03464:58 476.0408:26 476.12708:55 476.17636:26 476.18253:26 476.18869:26 476.19485:26 476.20102:…	122.00531:5 140.00908:5 140.01076:10 140.0141:5 140.01744:5 152.99879:5 153.00229:5 166.0293:5 180.40877:5 195.41296:5 196.03326:15 196.03525:20 196.03723:15 196.0392:20 196.04118:20 196.04315:26 196.04514:15 196.0471:10 196.04909:5 196.05107:15 196.66644:5 197.03691:5 198.02325:5 214.04456:5 214.04663:5 214.04869:5 214.05075:15 214.05283:5 214.05489:5 214.05696:5 214.06935:5 214.07762:5 215.4226…
LPC 18:2	10.9257	564.332	53867.6	793137	[M-H]-	564.33	C35H43N5O2	Lipids	SPJFYYJXNPEZDW-UHFFFAOYNA-N	O=C(OCC(O)COP(=O)([O-])OCC[N+](C)(C)C)CCCCCCCC=CCC=CCCCCC	86.9	563.83252:28 563.85266:56 563.91302:28 563.93982:28 563.94653:28 563.95996:28 563.96332:83 563.97003:28 563.97339:111 563.97675:56 563.98004:56 563.9834:111 563.98676:111 563.99011:111 563.99347:56 563.99683:28 564.00018:28 564.00354:148 564.01697:28 564.04041:69 564.1142:28 564.15784:28 564.16785:28 564.18799:28 564.22156:28 564.24835:28 564.26849:62 564.27185:28 564.28192:56 564.29199:411 564.2…	160.62627:10 168.04568:10 202.28209:10 224.05426:10 224.05637:20 224.06059:21 224.06271:20 224.06694:10 224.06905:10 224.07117:10 224.07327:20 224.07539:10 224.0775:10 224.31642:10 224.82004:10 225.06148:10 232.98067:10 242.07263:10 242.08142:10 242.08362:10 279.21967:21 279.22202:113 279.22437:41 279.22675:133 279.2291:144 279.23145:123 279.23383:124 279.23618:154 279.23853:124 279.24088:164 279…
S-Adenosyl-L-homocysteine	7.74585	383.111	30883	678809	[M-H]-	383.114	C14H20N6O5S	5'-deoxy-5'-thionucleosides	ZJUKTBDSGOFHSH-WFMPWKQPSA-N	N[C@@H](CCSC[C@H]1O[C@H]([C@H](O)[C@@H]1O)N1C=NC2=C(N)N=CN=C12)C(O)=O	67.8	382.72095:161 382.72372:161 382.9696:161 382.97513:321 383.0083:161 383.07187:161 383.07739:161 383.08014:321 383.09122:482 383.09396:482 383.09674:803 383.09949:2571 383.10226:3856 383.10501:7712 383.10779:7551 383.11053:10925 383.11331:10122 383.11609:9319 383.11884:6266 383.12161:4820 383.12436:3213 383.12714:1285 383.12988:2410 383.13266:803 383.13544:482 383.14096:161 383.14371:161 383.60541…	119.04442:10 119.05058:10 119.05212:10 119.05521:10 144.06129:10 145.02898:31 145.04088:10 146.42162:10 162.52002:10 163.03346:20 163.03526:10 163.03706:20 163.03886:20 163.04068:20 163.04248:10 163.04428:20 163.04788:20 166.173:10 167.17018:10 169.86107:10 219.07309:10 237.07437:10 383.0126:10 383.10104:10 383.11209:31 383.11487:10 383.12039:41 383.12314:10 383.12592:20 383.13144:20 383.13422:10…
isoimperatorin	9.22943	269.081	44897.4	510288	[M-H]-	269.082	C16H14O4		IGWDEVSBEKYORK-UHFFFAOYSA-N	O=C1OC=2C=C3OC=CC3=C(OCC=C(C)C)C2C=C1	85.1	268.93765:14 268.95386:14 268.9585:14 268.96082:28 268.96545:28 268.96777:14 268.97009:28 268.9747:57 268.97702:185 268.97934:128 268.98166:284 268.98398:284 268.9863:185 268.98862:156 268.99094:71 268.99323:43 268.99554:14 268.99786:57 269.00018:99 269.0025:14 269.00714:33 269.01175:14 269.02103:14 269.04419:50 269.04651:43 269.04883:14 269.05115:43 269.05347:51 269.05576:146 269.05807:108 269.0…	182.04338:10 183.03543:10 187.88513:10 195.04976:10 197.05458:10 197.05855:10 197.06647:20 209.05371:10 209.0578:10 209.06596:20 209.06801:10 209.07005:10 210.05737:10 210.05942:10 210.06146:10 210.06351:20 210.06555:20 210.0676:10 210.06966:20 210.0717:31 210.07375:41 210.07579:20 210.07784:20 210.08397:10 210.55293:10 211.03265:10 211.03676:10 211.04291:10 211.04701:10 211.07164:10 211.07779:10…
Isorhamnetin	5.31477	339.055	33258	503042	[M+Na]+	339.05	C16H12O7	Flavonols	IZQSVPBOUDKVDZ-UHFFFAOYSA-N	O=C1C(O)=C(OC=2C=C(O)C=C(O)C12)C=3C=CC(O)=C(OC)C3	75.1	338.65988:4 338.67288:4 338.67548:8 338.69626:4 338.85477:4 338.85736:4 338.89633:4 338.90155:8 338.90414:4 338.90933:4 338.91714:4 338.91974:4 338.92233:8 338.92493:4 338.92752:4 338.93274:4 338.94312:4 338.94571:4 338.95093:4 338.95352:4 338.95871:4 338.96133:4 338.96393:4 338.96652:4 338.97171:10 338.9899:12 338.99771:10 339.00031:10 339.01331:8 339.0159:27 339.01849:4 339.02109:13 339.02631:1…	100.00237:1 100.01649:1 100.0179:2 100.01931:1 100.02214:1 100.02355:1 100.02496:1 100.02779:1 100.03202:1 100.03767:1 100.05179:1 100.05603:1 100.07015:1 100.07156:1 100.07298:2 100.07439:1 100.0758:2 100.07721:3 100.07862:7 100.08003:13 100.08145:22 100.08286:47 100.08427:43 100.08569:60 100.0871:55 100.08851:28 100.08992:23 100.09133:28 100.09275:14 100.09416:11 100.09557:11 100.09698:6 100.09…
Coniferyl alcohol + O-Hex	1.704	387.116	24442.5	476562	[M+FA-H]-	387.129	C16H22O8	Phenolic glycosides	SFLMUHDGSQZDOW-UHFFFAOYNA-N	OCC=CC2=CC=C(OC1OC(CO)C(O)C(O)C1(O))C(OC)=C2	66.6	386.76096:23 387.00259:23 387.01093:23 387.03592:47 387.04425:49 387.04703:23 387.0498:48 387.05536:23 387.06091:47 387.06369:23 387.06647:23 387.06924:23 387.07205:23 387.07761:96 387.08038:240 387.08316:121 387.08594:97 387.08871:99 387.09149:148 387.09427:396 387.09705:370 387.09982:690 387.1026:1445 387.10538:3181 387.10815:4209 387.11093:6130 387.11371:6921 387.11649:7237 387.11926:5252 387.…	101.02301:10 113.01866:10 113.02617:10 117.02106:10 117.03328:10 117.06995:10 119.0322:10 119.03374:10 119.03528:20 119.03682:10 119.04144:20 143.04457:10 143.04796:10 143.0564:10 143.05809:10 149.04761:10 149.04933:10 161.03656:10 161.04193:10 179.05141:10 179.0533:20 179.05708:41 179.05896:10 179.06085:20 179.06274:20 179.4295:10 179.54112:10 184.22958:10 205.04099:10 341.09659:20 341.09918:10 …
Flavokawain B	1.98547	307.085	44703.4	464883	[M+Na]+	307.09	C17H16O4	2'-Hydroxychalcones	QKQLSQLKXBHUSO-CMDGGOBGSA-N	O=C(C=CC=1C=CC=CC1)C=2C(O)=CC(OC)=CC2OC	74.3	306.58542:5 306.59036:5 306.60272:5 306.65216:13 306.66205:12 306.71893:5 306.74365:5 306.76096:5 306.80545:5 306.82526:5 306.83267:5 306.8475:10 306.87222:10 306.90439:5 306.91428:5 306.91922:5 306.94644:5 306.95139:5 307.0058:14 307.00827:5 307.02557:5 307.04291:20 307.04538:10 307.04785:5 307.05032:30 307.0528:15 307.05774:19 307.06021:68 307.06268:129 307.06516:119 307.06763:123 307.0701:282 …	100.00413:1 100.00837:1 100.03519:1 100.03661:1 100.0705:1 100.07333:1 100.07615:1 100.07897:1 100.08179:1 100.08321:1 100.08462:2 100.08604:2 100.08745:1 100.08886:1 100.09168:1 100.09309:1 100.09451:1 100.09592:1 100.10016:1 100.14819:1 100.22167:1 100.28387:1 100.37579:1 100.40125:1 100.42812:1 100.69287:1 100.77505:1 100.94378:1 101.09277:1 101.09703:1 101.10129:1 101.10413:1 101.37829:1 101.…
4-HYDROXYBENZALDEHYDE	4.45318	121.029	19826	438925	[M-H]-	121.029	C7H6O2			O=Cc1ccc(O)cc1	80.2	120.57777:43 121.02007:22 121.02161:88 121.02317:133 121.02473:721 121.02628:2024 121.02783:4848 121.02938:6358 121.03094:3834 121.03249:3029 121.03404:1731 121.0356:884 121.03715:546 121.0387:452 121.04026:249 121.04181:136 121.04337:46 121.25473:23 121.26406:23 121.26872:23 121.43516:21 121.43671:22 121.45071:21 121.45227:21 121.46783:21 121.47095:21 121.48962:21 121.61883:21 121.62039:21 121.6…	121.02458:10 121.03235:10 121.03545:10 121.04012:10
Dopamine	3.15343	152.036	7763	282738	[M-H]-	152.072	C8H11NO2	Catecholamines and derivatives	VYFYYTLLBUKUHU-UHFFFAOYSA-N	OC1=CC=C(C=C1O)CCN	60.6	151.53886:16 151.54581:32 151.76143:16 152.02246:32 152.02594:17 152.02768:96 152.02942:372 152.03116:770 152.03291:1336 152.03465:1472 152.03639:1683 152.03813:1020 152.03987:608 152.04161:345 152.04335:297 152.04509:212 152.04683:147 152.04857:82 152.08688:16 152.37608:16 152.44406:16 152.44756:17 152.9745:16 153.01468:17 153.01642:48 153.01991:32 153.02341:16 153.02866:16 153.0304:16 153.03215…	152.03584:5 152.69644:5
2-Perfluorohexyl ethanoic acid	8.54847	376.986	8597.38	266129	[M-H]-	376.985	C8H3F13O2	PFSA	LRWIIEJPCFNNCZ-UHFFFAOYSA-N	O=C(O)CC(F)(F)C(F)(F)C(F)(F)C(F)(F)C(F)(F)C(F)(F)F	75.7	376.75287:21 376.89813:21 376.90912:21 376.91733:21 376.94748:21 376.95297:21 376.95572:21 376.96393:86 376.96667:150 376.96942:212 376.97217:426 376.97488:643 376.97763:1118 376.98038:1659 376.98312:1706 376.98587:2045 376.98862:1350 376.99133:1178 376.99408:472 376.99683:429 376.99957:256 377.00232:235 377.00507:109 377.00781:44 377.01328:43 377.02972:21 377.04617:21 377.05167:21 377.07086:21 3…	130.99915:10 135.0379:10 144.98962:10 242.96965:10 242.98505:20 242.98726:20 242.98946:10 242.99165:10 242.99385:20 242.99826:10 243.00487:20 245.18895:10 270.97098:10 270.98724:10 275.00247:10 292.97571:10 292.97815:10 292.98056:31 292.98538:31 292.98779:10 292.99023:51 292.99265:10 292.99506:10 293.00232:10 294.84943:10 295.99741:10 296.27686:10 298.99066:10 312.98755:10 377.12378:10 377.25269:…
FA 18:1+3O	7.9865	329.232	21122.3	244352	[M-H]-	329.231	C18H34O5	Oxidized fatty acids	MDIUMSLCYIJBQC-UHFFFAOYNA-N	O=C(O)CCCCCCCC(O)C=CC(O)C(O)CCCCC	81.5	328.90427:31 328.95291:31 328.95547:31 328.96573:31 328.97852:63 328.98108:220 328.98364:126 328.98621:63 328.98877:126 328.99133:188 328.99902:94 329.00415:31 329.00925:31 329.06818:31 329.07074:31 329.08096:31 329.08353:63 329.08609:31 329.08865:157 329.09122:126 329.09378:94 329.09634:31 329.09891:63 329.10147:31 329.10403:288 329.1066:31 329.1655:31 329.17319:31 329.17575:31 329.17831:162 329…	127.11862:10 137.41759:10 152.41203:10 153.12761:10 171.10516:10 181.12212:10 183.13638:10 183.14021:10 209.12894:10 211.1226:10 211.12465:10 211.13081:10 211.13286:31 211.13696:10 211.15132:10 212.01605:10 227.0186:10 229.13834:10 229.14474:10 229.14902:10 229.15115:10 229.15544:10 229.15971:10 229.21529:10 229.91917:10 230.15262:10 291.1947:10 300.55048:10 329.22342:10 329.22855:10 329.23111:20…
Ginsenoside Rb3	7.26803	1077.58	13912.6	197526	[M-H]-	1077.59	C53H90O22	Triterpenoids	SNPYJWZTTUVUIS-UHFFFAOYNA-N	CCC(C)=CCCC(C)(OC1OC(COC2OCC(O)C(O)C2O)C(O)C(O)C1O)C1CCC2(C)C1C(O)CC1C2CCC2C(C)(C)C(CCC12C)OC1OC(CO)C(O)C(O)C1OC1OC(CO)C(O)C(O)C1O	66.9	1077.14563:115 1077.16882:115 1077.33569:115 1077.46545:115 1077.48401:115 1077.49329:471 1077.49792:706 1077.50256:832 1077.5072:701 1077.51184:1082 1077.51636:2367 1077.521:2273 1077.52563:4799 1077.53027:6369 1077.53491:6877 1077.53955:9513 1077.54419:10528 1077.54883:13542 1077.55347:13054 1077.55811:13597 1077.56274:11534 1077.56738:10334 1077.57202:7691 1077.57666:6722 1077.5813:3840 1077.5…	231.09431:10 247.09439:10 715.42517:10 722.43707:10 735.43726:10 735.44489:10 739.44818:10 739.46741:10 739.48657:10 741.3078:10 743.68182:10 757.3877:10 851.4801:10 867.50488:10 884.44324:10 885.49341:20 885.49756:10 885.50177:10 885.50598:20 885.5144:20 885.52277:20 885.52698:10 885.53961:20 885.54382:10 885.54803:21 885.56061:10 886.64508:10 1017.60376:10 1028.11267:10 1028.13074:10 1028.16248…
Triclosan	8.30748	286.974	6256.75	197328	[M-H]-	286.944	C12H7Cl3O2	Diphenylethers	XEFQLINVKFYRCS-UHFFFAOYSA-N	C1=CC(=C(C=C1Cl)Cl)OC=2C=CC(=CC2O)Cl	78.1	286.86929:22 286.88364:22 286.90039:22 286.953:22 286.95538:22 286.96017:22 286.96255:87 286.96497:218 286.96735:370 286.96976:588 286.97214:1220 286.97452:1699 286.97693:1220 286.97931:1394 286.98172:915 286.9841:501 286.98648:545 286.98889:174 286.99127:261 286.99365:261 286.99606:87 286.99844:65 287.00085:87 287.00323:22 287.01041:44 287.01279:22 287.03195:22 287.06781:22 287.08218:22 287.0845…	142.99521:10 151.00854:10 152.9268:10 154.99428:10 154.99603:10 155.00833:10 181.00247:10 190.03166:10 192.99214:10 218.01227:10 286.96445:10 286.97162:10 286.9812:10 286.98358:20 286.98596:41 286.98837:20 286.99316:10
Ginsenoside Rb1	7.18855	1107.57	12542.1	187247	[M-H]-	1107.6	C54H92O23	Triterpene saponins	GZYPWOGIYAIIPV-UHFFFAOYNA-N	CC(C)=CCCC(C)(OC1OC(COC2OC(CO)C(O)C(O)C2O)C(O)C(O)C1O)C1CCC2(C)C1C(O)CC1C3(C)CCC(OC4OC(CO)C(O)C(O)C4OC4OC(CO)C(O)C(O)C4O)C(C)(C)C3CCC21C	61.8	1107.16272:147 1107.17212:147 1107.19092:147 1107.20496:147 1107.29895:147 1107.45874:147 1107.49158:147 1107.49634:441 1107.50098:147 1107.50574:588 1107.51038:1029 1107.51514:735 1107.51978:1181 1107.52454:1622 1107.52917:1769 1107.53394:2063 1107.53857:3386 1107.54333:2962 1107.54797:3109 1107.55273:5349 1107.55737:4173 1107.56213:5643 1107.56677:6707 1107.57153:4039 1107.57617:2949 1107.58093…	246.61934:10 599.33618:10 607.41785:10 751.43732:10 769.42285:10 769.45026:10 885.55121:10 915.45325:10 915.48743:10 915.4917:10 915.49597:20 915.50452:10 915.52161:20 915.55579:10 915.56433:10 916.50031:10 918.33514:10 979.77216:10 987.8418:10 1031.6189:10 1046.59875:10 1047.55371:10 1047.5675:21 1047.59033:10 1047.61316:10 1048.55945:10 1058.09631:21 1060.38037:21 1061.50256:10 1061.51648:10 10…
N-Carbamoyl-DL-aspartic acid	2.34847	175.06	5409.56	175174	[M-H]-	175.036	C5H8N2O5	Aspartic acid and derivatives	HLKXYZVTANABHZ-UHFFFAOYNA-N	OC(=O)CC(NC(O)=N)C(O)=O	65.8	174.99092:10 175.00586:21 175.00772:10 175.0096:21 175.01334:21 175.04321:10 175.05069:31 175.05255:52 175.05443:189 175.05629:424 175.05817:937 175.06003:1341 175.0619:1071 175.06377:841 175.06563:468 175.0675:234 175.06937:232 175.07124:128 175.0731:105 175.07498:74 175.07684:54 175.50868:11 175.51617:11 175.64902:10 175.68269:10 176.05533:10 176.05721:10 176.05908:52 176.06094:62 176.06282:52 …	115.04951:10 175.06783:10 793.09137:10
9Z,12Z-Linoleic acid	13.711	279.233	18440.5	155534	[M-H]-	279.233	C18H32O2	Lineolic acids and derivatives	OYHQOLUKZRVURQ-HZJYTTRNSA-N	CCCCC\C=C/C\C=C/CCCCCCCC(O)=O	85.3	278.83621:4 278.87158:4 278.87396:4 278.93762:4 278.95178:4 278.96121:4 278.96356:4 278.96591:13 278.96829:9 278.97064:9 278.97299:4 278.97534:13 278.97772:9 278.98007:18 278.98242:9 278.9848:27 278.98715:13 278.9895:13 278.99185:22 278.99423:13 278.99658:4 279.00366:13 279.00601:4 279.00836:11 279.01309:11 279.02017:4 279.03668:4 279.04846:4 279.05789:4 279.06497:4 279.0697:11 279.07913:10 279.1…	124.51462:3 229.38431:3 229.48697:3 229.49126:3 229.49553:3 229.60251:3 229.73518:3 230.30913:3 231.94495:3 232.04173:3 233.8456:3 255.98485:3 255.99615:3 256.06845:3 256.26733:3 256.34872:3 256.35324:3 279.21255:3 279.21729:3 279.22437:3 279.22672:5 279.22906:10 279.23145:18 279.2338:10 279.23615:13 279.23849:23 279.24088:13 279.24323:15 279.24557:5 279.24796:5 279.25031:3 279.25266:3 279.25974:…
[(2R,3R,4R,5R,6R)-4-[(2S,3R,4S,5R,6S)-3,4-dihydroxy-6-methyl-5-[(2S,3R,4R,5R,6S)-3,4,5-trihydroxy-6-methyloxan-2-yl]oxyoxan-2-yl]oxy-5-hydroxy-6-[(2S,3S,4R,5R)-4-hydroxy-2,5-bis(hydroxymethyl)-3-[(E)-3-(4-hydroxyphenyl)prop-2-enoyl]oxyoxolan-2-yl]oxy-2-(hydroxymethyl)oxan-3-yl] (E)-3-(4-hydroxyphenyl)prop-2-enoate	1.74467	925.239	5220.69	142024	[M-H]-	925.298	C42H54O23		RTQZACYXEASSEF-FTOGDFEBSA-N	O=C(OC1C(OC(OC2(OC(CO)C(O)C2OC(=O)C=CC3=CC=C(O)C=C3)CO)C(O)C1OC4OC(C)C(OC5OC(C)C(O)C(O)C5O)C(O)C4O)CO)C=CC6=CC=C(O)C=C6	70.5	924.83502:58 924.83929:29 925.16998:59 925.17426:29 925.17859:29 925.18286:116 925.18713:88 925.19147:176 925.19574:235 925.20007:235 925.20435:235 925.20862:412 925.21295:590 925.21722:984 925.2215:1284 925.22583:1612 925.2301:1668 925.23444:1779 925.23871:2174 925.24298:1718 925.24731:1655 925.25159:1616 925.25586:972 925.26019:1292 925.26447:763 925.26874:381 925.27307:205 925.27734:323 925.28…	240.36604:10 240.44267:10 271.09866:10 305.08383:10 403.0513:10 405.04669:10 419.10315:10 420.10974:10 509.10123:10 563.81616:10 617.07513:10 619.20612:10 751.10852:10 797.12903:10 827.31403:10 829.12646:10 925.21191:10 925.22052:10 925.2334:10 925.23767:10 925.242:20 925.24628:10 925.25061:20 925.25916:31 925.26349:31 925.26776:20 925.27203:41 925.27637:10 925.28064:20 925.28497:20 925.28925:31 …
LPC 16:0	11.4364	496.327	12347.9	133456	[M+H]+	496.34	C24H50NO7P	Lipids	ASWBNKHCZGQVJV-UHFFFAOYNA-N	O=C(OCC(O)COP(=O)([O-])OCC[N+](C)(C)C)CCCCCCCCCCCCCCC	88.4	495.85822:4 495.86765:9 495.88022:4 495.88336:12 495.91165:4 495.93365:4 495.98395:4 495.99338:9 496.04684:4 496.06885:4 496.10974:4 496.1915:4 496.20721:4 496.21664:4 496.21979:9 496.22607:4 496.24179:4 496.24493:11 496.25125:4 496.26068:4 496.26382:8 496.28268:12 496.29211:14 496.29526:20 496.2984:39 496.30154:88 496.30472:139 496.30786:223 496.311:409 496.31415:1042 496.31729:2416 496.32043:38…	101.34492:2 103.76252:2 103.76396:2 103.76971:2 103.77115:2 103.77259:8 103.77402:10 103.77547:8 103.7769:2 103.77834:4 103.77978:4 103.78122:6 103.7841:4 103.78697:4 103.78841:2 103.78985:2 103.79704:2 103.80998:2 103.8776:2 103.9438:4 103.951:2 103.99563:4 104.00571:4 104.02155:4 104.09499:9 104.09643:37 104.09787:71 104.09931:173 104.10075:351 104.1022:784 104.10364:951 104.10507:1083 104.1065…
6a,7,8-trihydroxy-3-methyl-3,4,5,6,7,12a-hexahydro-2H-benzo[a]anthracene-1,12-dione	4.53335	327.109	4381.25	128532	[M-H]-	327.124	C19H20O5		CRULJZWXPCYLAC-UHFFFAOYSA-N	O=C1C2=C(CCC3(O)C(O)C=4C(O)=CC=CC4C(=O)C23)CC(C)C1	85.9	326.64221:12 326.92554:12 326.95874:35 326.9664:83 326.96896:35 326.97406:12 326.97662:35 326.97916:12 326.98428:12 326.98938:12 326.99448:12 327.0047:24 327.0098:24 327.01236:24 327.01492:59 327.01746:12 327.02002:12 327.04044:12 327.04556:12 327.05066:12 327.05322:12 327.06598:12 327.07108:24 327.07364:12 327.0762:36 327.07877:12 327.0813:24 327.08386:24 327.08643:12 327.08896:35 327.09152:47 3…	309.15979:10 327.13101:10 328.13037:10
PFCA-perfluoroalkyl_Hsubstituted_1DB	11.49	606.977	2071.12	116193	[M-H]-	606.963	C13H2F22O2	PFSA	KFEUVUQBWUUMBJ-UPHRSURJSA-N	O=C(O)C=C(F)C(F)(F)C(F)(F)C(F)(F)C(F)(F)C(F)(F)C(F)(F)C(F)(F)C(F)(F)C(F)(F)C(F)(F)F	67.6	606.4975:15 606.50098:15 606.53577:15 606.80005:15 606.80353:15 606.86615:15 606.87311:15 606.87659:30 606.88007:30 606.88702:15 606.8905:30 606.89746:15 606.90094:15 606.9079:30 606.93573:15 606.93921:30 606.94269:61 606.94617:61 606.94965:122 606.95312:198 606.9566:243 606.96008:380 606.96356:198 606.96704:410 606.97052:441 606.974:410 606.97748:578 606.98096:319 606.98444:441 606.98792:213 606…	240.93605:10 284.87329:10 284.89954:10 302.99164:10 307.01132:10 308.98639:10 332.983:10 342.97198:10 346.99258:10 480.974:10 542.99738:10 546.9762:10 566.96039:10 566.98053:10 590.18799:10 606.97766:10
Magnolol	8.22698	265.087	9431.62	112758	[M-H]-	265.123	C18H18O2	Biphenyls and derivatives	VVOAZFWZEDHOOU-UHFFFAOYSA-N	OC1=C(C=C(CC=C)C=C1)C1=C(O)C=CC(CC=C)=C1	65	264.96939:38 264.98087:38 264.98315:114 264.98547:228 264.98776:267 264.99005:343 264.99237:230 264.99466:305 264.99695:115 264.99927:114 265.00156:76 265.04752:38 265.06131:114 265.06363:76 265.06592:76 265.06821:114 265.07053:38 265.07281:153 265.0751:268 265.07742:841 265.07971:1460 265.082:2555 265.08432:3825 265.08661:4313 265.0889:2923 265.09122:2153 265.09351:1461 265.09579:769 265.09811:6…	109.02663:10 112.98235:10 133.02557:10 133.02721:20 133.02884:31 133.03046:20 133.03372:10 133.03535:10 133.04024:10 133.04839:10 219.1796:10 219.52258:10 237.06125:10 237.09822:10 265.07645:20 265.08334:20 265.08795:10 265.09024:10 265.09256:20 266.07745:10
naringenin-7-O-glucoside	6.1896	433.111	8759.69	105100	[M-H]-	433.114	C21H22O10	Flavonoid-7-O-glycosides	DLIKSSGEMUFQOK-RGHIGTIISA-N	O=C1C2=C(O)C=C(OC3OC(CO)C(O)C(O)C3O)C=C2OC(C4=CC=C(O)C=C4)C1	71.5	432.85199:9 432.96658:9 433.00772:19 433.0224:9 433.03122:29 433.03711:9 433.04004:9 433.04297:19 433.06354:47 433.06647:19 433.06943:9 433.07236:39 433.07529:58 433.07825:81 433.08118:20 433.08411:101 433.08704:60 433.09:111 433.09293:201 433.09586:290 433.09882:534 433.10175:1159 433.10468:2001 433.1076:3099 433.11057:3982 433.11349:3980 433.11642:3330 433.11938:2231 433.12231:1350 433.12524:84…	103.02542:10 166.05284:10 166.11472:10 166.11836:10 166.12564:10 166.39511:10 271.05713:10 271.05945:10 271.06177:10 271.07339:10 478.89404:10
Triptophenolide	11.6103	311.166	4359.88	101398	[M-H]-	311.165	C20H24O3	Oxosteroids	KPXIBWGPZSPABK-FXAWDEMLSA-N	O=C1OCC2=C1CCC3(C4=CC=C(C(O)=C4CCC23)C(C)C)C	84.4	310.9024:6 310.91238:6 310.91986:6 310.94974:6 310.96716:12 310.97214:25 310.97461:6 310.97711:25 310.97961:62 310.98209:37 310.98706:12 310.98956:25 310.99207:25 310.99454:12 310.99704:12 310.99951:6 311.00452:6 311.00699:19 311.00949:12 311.02194:6 311.04684:6 311.05432:6 311.0593:6 311.11905:6 311.134:6 311.13651:19 311.13898:38 311.14148:25 311.14395:32 311.14645:31 311.14896:32 311.15143:32 …	183.00471:10 311.16693:10 311.17191:10 311.17438:20 311.17688:10 311.18185:31 311.18436:10 311.18683:10 311.18933:10 311.54065:10 311.65283:10
Inosine	7.9865	267.104	8613.94	96826.8	[M-H]-	267.073	C10H12N4O5	Purine nucleosides	UGQMRVRMYYASKQ-KQYNXXCUSA-N	OC[C@H]1O[C@H]([C@H](O)[C@@H]1O)N1C=NC2=C1N=CN=C2O	65.7	266.95676:31 266.96368:31 266.97983:31 266.98212:63 266.98444:31 266.98676:94 266.98904:63 266.99136:31 266.99597:31 267.00519:31 267.00983:31 267.01443:63 267.02597:31 267.02829:31 267.0329:31 267.06982:31 267.07211:31 267.07672:31 267.07904:31 267.08136:31 267.08597:158 267.08826:63 267.09058:188 267.0929:414 267.09518:1653 267.0975:2571 267.09982:2967 267.10211:3433 267.10443:3651 267.10672:24…	135.04294:20 135.04622:20 135.04787:10 136.04741:10 146.24556:10
Tryptophan	1.90633	203.084	4240.38	88334.4	[M-H]-	203.083	C11H12N2O2	Indolyl carboxylic acids and derivatives	QIVBCDIJIAJPQS-UHFFFAOYNA-N	NC(CC1=CNC2=CC=CC=C12)C(O)=O	60.5	203.02547:28 203.0295:28 203.03552:28 203.03955:28 203.04961:28 203.05565:83 203.05766:55 203.05968:28 203.06772:28 203.06973:55 203.07175:55 203.07376:28 203.07578:249 203.07779:470 203.07979:858 203.0818:802 203.08382:885 203.08583:830 203.08784:277 203.08986:277 203.09187:111 203.09389:166 203.09589:83 203.09991:28 203.10193:28 203.12407:28 203.13815:28 203.49452:28 203.50258:28 203.51265:28 2…	142.06804:10 142.28188:10 159.09427:10 462.7323:10
HYDROQUINIDINE	12.6356	325.182	3579.5	85281.1	[M-H]-	325.192	C20H26N2O2		LJOQGZACKSYWCH-UHFFFAOYSA-N	OC(C=1C=CN=C2C=CC(OC)=CC21)C3N4CCC(C3)C(C4)CC	90.9	324.97314:4 324.97568:4 324.97821:12 324.98077:32 324.98331:52 324.98587:61 324.9884:105 324.99097:44 324.9935:61 324.99603:36 324.9986:12 325.00113:29 325.00369:8 325.00623:8 325.00876:8 325.01132:8 325.01385:4 325.13351:8 325.14624:16 325.1488:4 325.15134:4 325.15387:20 325.15643:16 325.15897:33 325.16153:45 325.16406:50 325.16663:25 325.16916:97 325.17169:110 325.17426:239 325.17679:404 325.17…	119.05008:1 119.05316:1 119.0547:1 120.01652:1 121.94707:1 169.9913:1 170.00052:1 170.01157:1 170.99617:1 183.00262:3 183.00644:4 183.00836:3 183.01027:4 183.01218:3 183.01408:7 183.01599:2 183.01791:5 183.02173:1 183.02364:1 183.44032:1 184.01453:1 184.01645:1 184.01836:1 184.02219:1 184.02602:1 187.79192:1 197.02454:1 198.03867:1 211.04262:1 225.06339:1 226.07712:1 253.10339:1 258.97568:1 276.9…
Oleic acid	14.559	281.246	6456.19	73415.1	[M-H]-	281.249	C18H34O2	Long-chain fatty acids	ZQPPMHVWECSIRJ-KTKRTIGZSA-N	CCCCCCCC\C=C/CCCCCCCC(O)=O	85.3	280.83215:4 280.84399:4 280.86765:4 280.95996:4 280.96231:4 280.9718:20 280.97415:32 280.97653:93 280.97888:117 280.98126:238 280.98361:161 280.98599:121 280.98834:69 280.99072:69 280.9931:65 280.99545:28 280.99783:28 281.00018:12 281.00256:9 281.00491:18 281.00729:4 281.06647:4 281.06885:21 281.08304:4 281.08777:9 281.10199:8 281.20615:4 281.21799:18 281.22037:9 281.22272:22 281.2251:31 281.2274…	140.27122:5 140.33478:5 140.98122:5 281.23621:10 281.23859:10 281.24332:10 281.25278:10 281.25516:10 281.25754:15 281.25989:5 281.267:5 281.26938:10 281.27884:5 281.28122:5 281.82617:5 282.25064:5 282.26013:10 289.22992:5 461.56815:5 921.13104:5
Palmitic Acid	14.4777	255.233	6204.94	72124.7	[M-H]-	255.233	C16H32O2		IPCSVZSSVZVIGE-UHFFFAOYSA-N	O=C(O)CCCCCCCCCCCCCCC	86.4	254.95296:8 254.96875:4 254.97325:8 254.97777:16 254.98003:24 254.98227:12 254.98453:24 254.98679:40 254.98904:24 254.99129:20 254.99355:12 254.9958:4 255.00031:4 255.00708:4 255.0161:4 255.02286:8 255.02512:4 255.03188:4 255.03413:4 255.03639:8 255.03865:4 255.04089:4 255.04315:12 255.04767:8 255.05217:4 255.05894:8 255.06119:4 255.0657:4 255.07022:4 255.07246:4 255.07472:4 255.18298:8 255.1875:…	229.38219:5 229.48914:10 229.49554:5 229.60252:5 229.73306:5 230.30914:5 231.94281:5 232.04175:5 233.84778:5 254.42836:5 255.23309:5 255.23535:5 255.23761:20 255.85837:5 255.97583:5 255.98035:5 256.06845:5 256.24475:5 256.26736:5 256.35098:10
Stearic acid	15.5008	283.265	6232.25	61098.2	[M-H]-	283.264	C18H36O2	Long-chain fatty acids	QIQXTHQIDYTFRH-UHFFFAOYSA-N	CCCCCCCCCCCCCCCCCC(O)=O	78.1	282.81604:4 282.82318:4 282.82791:4 282.88016:4 282.89441:4 282.91818:4 282.93243:4 282.95856:4 282.96091:12 282.96329:8 282.96567:4 282.96805:4 282.97043:8 282.97281:8 282.97516:16 282.97754:28 282.97992:28 282.9823:36 282.98468:36 282.98706:8 282.98941:16 282.99179:20 282.99417:4 282.99655:8 282.99893:16 283.00131:8 283.00366:16 283.00604:4 283.01318:4 283.01556:4 283.02029:12 283.02267:8 283.0…	170.03572:2 262.99768:2 283.24783:2 283.26212:6 283.2645:2 283.26685:2 283.26923:6 283.27161:2 283.27399:6 283.27637:2 283.27875:4 283.28113:2 283.28586:2 283.30252:2 284.27542:2 285.91101:2 1395.7522:2
Isoastragaloside I	10.5433	869.464	7396.56	60161.6	[M+H]+	869.49	C45H72O16	Cucurbitacin glycosides	HVPKALQHGQMJER-HXVHHZASSA-N	O=C(OC1COC(OC2CCC34CC54CCC6(C)C(C(O)CC6(C)C5CC(OC7OC(CO)C(O)C(O)C7O)C3C2(C)C)C8(OC(CC8)C(O)(C)C)C)C(OC(=O)C)C1O)C	73.8	868.99744:8 869.01825:4 869.04321:4 869.07233:4 869.1181:8 869.12225:4 869.14307:8 869.14728:4 869.16388:4 869.1889:4 869.21802:20 869.22632:4 869.23047:4 869.24298:4 869.25128:4 869.27209:8 869.28876:4 869.29291:4 869.33453:4 869.33875:8 869.3429:8 869.36371:4 869.36786:9 869.37616:12 869.38037:9 869.38452:4 869.38867:8 869.39282:8 869.40118:4 869.40533:8 869.40948:10 869.41364:9 869.41779:5 869…	102.71219:5 103.0358:5 103.03867:5 103.04727:5 104.34547:5 104.7251:5 107.08016:5 107.08308:10 107.08746:5 107.09039:5 109.02021:5 109.02316:5 109.02463:5 109.06591:5 109.09393:5 109.09687:15 109.09835:5 109.09982:15 109.10278:5 109.10425:5 109.10572:5 109.1131:5 109.11604:5 109.119:5 109.51163:5 109.78957:5 111.03419:5 111.03568:10 111.03717:10 111.03866:20 111.04015:15 111.04163:31 111.04312:26…
4-Methylabyssinone V	6.71207	421.207	5347.62	57134.8	[M-H]-	421.203	C26H30O5		JHEBMTRMMJXPTM-QHCPKHFHSA-N	O=C1C=2C(O)=CC(O)=CC2OC(C=3C=C(C(OC)=C(C3)CC=C(C)C)CC=C(C)C)C1	65.3	420.93219:29 420.93509:29 420.96405:60 420.97275:29 421.10022:29 421.14661:29 421.15817:29 421.16977:29 421.17267:209 421.17557:59 421.17847:29 421.18137:119 421.18427:269 421.18716:147 421.19006:118 421.19296:509 421.19586:870 421.19876:1742 421.20166:2463 421.20456:2783 421.20746:3331 421.21036:2990 421.21326:2033 421.21616:1294 421.21902:1114 421.22192:666 421.22482:391 421.22772:121 421.23062…	101.02575:10 149.0441:10 161.04726:10 221.07777:10 246.98129:10 289.18652:10 421.23117:10 421.23407:10
N-ACETYL-L-LEUCINE	4.93967	172.098	1674.44	54840.7	[M-H]-	172.097	C8H15NO3	Leucine and derivatives	WXNXCEHXYPACJF-ZETCQYMHSA-N	O=C(NC(C(=O)O)CC(C)C)C	68.3	171.81656:7 171.83507:7 172.0128:7 172.01836:7 172.02022:7 172.02206:7 172.02391:7 172.08504:7 172.08875:7 172.09059:57 172.09245:85 172.0943:213 172.09615:427 172.09801:498 172.09985:285 172.10172:135 172.10356:93 172.10541:28 172.10727:14 172.47052:7 172.56511:7 172.57996:7 172.9957:7 173.00499:7 173.07558:14 173.07742:14 173.09229:14 173.09415:21 173.09601:14 173.09787:28 173.09972:43 173.1015…	130.09399:10 131.08638:10
3-(2,4-dihydroxyphenyl)-5-hydroxy-8,8-dimethyl-6-(3-methylbut-2-enyl)pyrano[2,3-h]chromen-4-one	7.8655	419.132	3857.94	54788.5	[M-H]-	419.15	C25H24O6		ZSSVYEUXLNVQMH-UHFFFAOYSA-N	O=C1C(=COC=2C=3C=CC(OC3C(=C(O)C12)CC=C(C)C)(C)C)C=4C=CC(O)=CC4O	61.1	418.91574:64 418.92441:64 418.97064:64 418.97354:64 418.97644:64 418.98798:128 418.99954:64 419.00534:64 419.08914:128 419.09204:64 419.10361:128 419.10651:64 419.11227:128 419.11517:64 419.11807:385 419.12094:257 419.12384:449 419.12674:1220 419.12961:1348 419.13251:1541 419.13541:1413 419.13831:1284 419.14117:1156 419.14407:514 419.14697:578 419.14984:128 419.15274:64 419.15564:321 419.15854:12…	131.04437:10 149.05762:20 149.06279:10 188.13858:10 251.03635:10 270.98264:10 419.12659:10
FA 18:2+2O	9.95407	311.221	2202.5	53322	[M-H]-	311.221	C18H32O4	Oxidized fatty acids	JGUNZIWGNMQSBM-UHFFFAOYNA-N	O=C(O)CCCCCCCC(OO)C=CC=CCCCCC	62.6	310.93936:7 310.94186:7 310.95181:7 310.95929:7 310.96426:7 310.96677:7 310.96924:27 310.97174:34 310.97421:48 310.97672:34 310.97922:34 310.98169:14 310.98419:7 310.98666:20 310.98917:20 310.99167:20 310.99414:14 310.99664:14 310.99911:7 311.00409:7 311.01157:7 311.01904:7 311.13858:7 311.14108:7 311.14606:14 311.14856:14 311.15103:7 311.15353:7 311.16849:7 311.17096:7 311.17844:27 311.18094:7 3…	113.99506:10 181.12274:10 211.86458:10 223.17836:10 224.95174:10 230.99165:10 244.98177:10 293.21817:10 311.01291:10 1167.07922:10
LPC 18:1	11.7297	522.342	5403.62	49674.1	[M+H]+	522.356	C26H52NO7P	Lipids	YAMUFBLWGFFICM-UHFFFAOYNA-N	O=C(OCC(O)COP(=O)([O-])OCC[N+](C)(C)C)CCCCCCCC=CCCCCCCCC	89.9	521.88409:4 521.89703:4 521.94861:4 522.00989:4 522.01312:8 522.05505:4 522.11633:4 522.15186:4 522.17767:4 522.20026:4 522.21637:4 522.22925:8 522.23572:4 522.24219:4 522.2486:13 522.27441:12 522.27765:9 522.28088:8 522.28412:4 522.28735:4 522.29376:8 522.297:29 522.30347:8 522.3067:14 522.30994:18 522.31317:37 522.31635:84 522.31958:121 522.32281:197 522.32605:385 522.32928:765 522.33252:1404 5…	100.21829:1 100.61866:1 102.10256:1 102.93737:1 103.42065:1 103.58008:1 103.74394:1 103.76408:1 103.76695:1 103.76839:2 103.77126:1 103.77271:1 103.77414:1 103.77558:2 103.77702:1 103.77846:1 103.78133:1 103.78277:1 103.78564:1 103.78709:1 103.79428:1 103.84319:1 103.84463:1 103.88059:1 103.88348:1 103.89787:1 103.94104:1 103.96263:1 103.98279:1 104.0159:1 104.01878:1 104.02166:1 104.0303:1 104.0…
Furostane base -2H + O-Hex	8.13893	577.358	4877	49487.9	[M-H2O+H]+	577.377	C33H54O9	Steroidal saponins	DFVRTHJUFCVHTR-UHFFFAOYNA-N	OCC6OC(OCC(C)CCC4(O)(OC3CC2C5CC=C1CC(O)CCC1(C)C5(CCC2(C)C3C4(C))))C(O)C(O)C6(O)	80.4	577.10675:4 577.11688:4 577.15424:4 577.21527:8 577.21863:12 577.22546:8 577.26276:8 577.26953:13 577.27295:4 577.27631:9 577.27972:4 577.29327:4 577.30347:4 577.30682:8 577.31024:12 577.31366:12 577.31702:21 577.32043:13 577.32379:9 577.32721:26 577.33057:73 577.33398:87 577.3374:179 577.34076:328 577.34418:661 577.34753:1153 577.35095:1774 577.35431:2039 577.35773:2142 577.36115:1972 577.3645:1…	101.46721:1 104.10077:1 105.06232:4 105.06667:1 105.06956:3 105.0768:1 105.07969:1 105.08114:1 106.53625:1 107.04689:1 107.07464:1 107.08048:3 107.08195:6 107.0834:4 107.08487:6 107.08633:4 107.08779:9 107.08925:1 107.09071:1 107.09217:3 107.09364:1 107.09509:1 107.10825:1 107.5851:1 108.1041:1 109.01759:1 109.02201:1 109.02348:1 109.02791:1 109.03085:1 109.05444:3 109.05739:4 109.05887:3 109.060…
2,5-dihydroxy-3-undecylcyclohexa-2,5-diene-1,4-dione	12.6356	293.175	3085.5	47233.7	[M-H]-	293.176	C17H26O4	P-benzoquinones	IRSFLDGTOHBADP-UHFFFAOYSA-N	O=C1C=C(O)C(=O)C(=C1O)CCCCCCCCCCC	80	292.89429:4 292.96436:4 292.96677:4 292.97162:16 292.97403:20 292.97644:16 292.97885:77 292.98126:89 292.9837:89 292.98611:105 292.98853:52 292.99094:36 292.99335:36 292.99579:24 292.9982:12 293.00061:20 293.00543:12 293.00787:20 293.01028:8 293.0127:4 293.01511:4 293.02237:4 293.05377:8 293.05862:8 293.06104:8 293.06345:4 293.06586:8 293.12631:4 293.14081:4 293.14322:4 293.14563:8 293.14807:8 29…	112.62508:1 135.05406:1 163.01859:1 176.71939:1 179.04527:1 221.05643:1 221.72456:1 224.98077:1 293.0025:1 293.01218:1 293.16931:1 293.17413:4 293.17654:7 293.17896:4 293.1814:5 293.18381:10 293.18622:5 293.18863:2 293.19107:5 293.19348:1 293.19589:3 293.1983:3 293.20074:1 293.20316:1 293.48611:1 296.56149:1 407.7489:1
Phthalic acid	4.93967	165.019	1481.81	43947.8	[M-H]-	165.019	C8H6O4	Benzoic acids	XNGIFLGASWRNHJ-UHFFFAOYSA-N	O=C(O)C=1C=CC=CC1C(=O)O	66	164.94606:7 164.94788:14 164.95151:7 164.95512:7 164.95694:29 164.95876:14 165.0041:14 165.00591:29 165.01135:14 165.01317:51 165.01498:187 165.0168:340 165.01862:424 165.02042:365 165.02223:264 165.02405:79 165.02586:64 165.02768:72 165.0295:36 165.03131:43 165.03313:7 165.03493:7 165.03674:7 165.03856:7 165.04944:7 165.05125:14 165.05307:14 165.05489:7 165.0567:14 165.05852:14 165.06396:7 165.3…	120.01847:10 121.03075:10 121.03387:10 133.01587:10
(2R,2aR,2'R,5R,5'R,6aR,8aS,9S)-4-(((2S,3R,4S,5R,6R)-3,4-dihydroxy-5-(((2S,3R,4S,5R)-5-hydroxy-3-(((2S,3S,4S,5R,6S)-3,4,5-trihydroxy-6-(hydroxymethyl)tetrahydro-2H-pyran-2-yl)oxy)-4-(((2S,3R,4S,5R)-3,4,5-trihydroxytetrahydro-2H-pyran-2-yl)oxy)tetrahydro-2H-pyran-2-yl)oxy)-6-(hydroxymethyl)tetrahydro-2H-pyran-2-yl)oxy)-5',6a,8a,9-tetramethyldocosahydrospiro[naphtho[2',1':4,5]indeno[2,1-b]furan-10,2…	10.2918	1053.49	4991.88	38278.7	[M+H]+	1053.51	C49H80O24	Steroidal saponins	RBFNEOONBAEQRW-YUGSMDRKSA-N	OCC1OC(OC2C(OCC(O)C2OC3OCC(O)C(O)C3O)OC4C(O)C(O)C(OC5CC6(O)C(O)CC7C(CCC8(C)C7CC9OC%10(OCC(C)CC%10)C(C)C98)C6(C)CC5O)OC4CO)C(O)C(O)C1O	77.2	1052.99414:4 1053.01245:4 1053.01697:4 1053.02161:4 1053.02612:4 1053.04907:8 1053.05359:8 1053.06738:4 1053.08569:4 1053.09949:4 1053.16357:4 1053.20483:4 1053.22314:12 1053.23694:4 1053.24146:4 1053.29651:4 1053.31934:4 1053.33765:8 1053.37439:13 1053.37891:4 1053.38354:8 1053.3927:9 1053.39722:4 1053.40637:4 1053.42017:8 1053.42932:12 1053.43396:12 1053.43848:17 1053.44312:4 1053.44763:32 1053…	107.38741:3 115.58321:3 127.39529:3 132.35863:3 173.82117:3 192.25684:3 199.98505:3 202.76178:3 215.70958:3 216.34247:3 229.16068:3 254.59326:3 254.82983:3 265.21954:3 302.97253:3 314.84525:3 318.1153:3 364.55856:3 365.10059:3 416.10095:3 449.20786:3 468.54089:3 485.46515:3 499.69022:3 529.36707:3 537.95428:3 553.30505:3 560.96613:3 573.87305:3 576.9989:3 588.45319:3 591.16528:3 604.01056:3 613.7…
Erucamide	15.666	338.335	5919.25	37277.1	[M+H]+	338.342	C22H43NO	Fatty amides	UAUDZVJPLUQNMU-UHFFFAOYSA-N	N=C(O)CCCCCCCCCCCC=CCCCCCCCC	89	337.84195:4 337.86789:4 337.92758:4 337.9743:4 338.09888:4 338.11966:4 338.13522:4 338.14301:4 338.15338:4 338.15598:4 338.16379:4 338.17935:4 338.20013:8 338.20532:4 338.20792:4 338.21829:4 338.2287:13 338.24167:9 338.24686:9 338.24945:4 338.28061:8 338.2832:4 338.29099:12 338.2988:8 338.30139:8 338.30399:13 338.30658:10 338.30917:27 338.31177:50 338.31436:50 338.31696:84 338.31955:134 338.32217…	100.00092:1 100.06306:1 100.0687:4 100.07011:12 100.07153:12 100.07294:22 100.07435:21 100.07577:27 100.07718:15 100.07859:16 100.08:10 100.08141:3 100.08282:8 100.08424:3 100.08565:2 100.08706:1 100.08848:1 100.08989:4 100.09271:1 100.09695:1 100.10683:1 100.10825:1 100.11108:1 100.11249:3 100.1139:1 100.11531:1 100.11955:1 100.12096:1 100.15911:1 100.27076:1 100.36691:1 100.40935:1 100.43906:2 …
(2S,3S,4S,5R,6S)-2-(((2S,3R,4S,5R,6R)-2-(((2R,3R,4S,5R,6S)-4,5-dihydroxy-6-(((2'R,5R,5'R,9S)-5-hydroxy-5',6a,8a,9-tetramethyl-1,3,3',4,4',5,5',6,6a,6b,6',7,8,8a,8b,9,11a,12,12a,12b-icosahydrospiro[naphtho[2',1':4,5]indeno[2,1-b]furan-10,2'-pyran]-4-yl)oxy)-2-(hydroxymethyl)tetrahydro-2H-pyran-3-yl)oxy)-5-hydroxy-6-(hydroxymethyl)-4-(((2R,3R,4R,5R)-3,4,5-trihydroxytetrahydro-2H-pyran-2-yl)oxy)tetr…	7.35382	1071.5	1376.81	37126.1	[M+Na]+	1071.49	C50H80O23	Steroidal saponins	XVPVVWNZAJAPLF-AJPUGSBYSA-N	OCC1OC(OC2C(OC(CO)C(O)C2OC3OCC(O)C(O)C3O)OC4C(O)C(O)C(OC5CC6=CCC7C(CCC8(C)C7CC9OC%10(OCC(C)CC%10)C(C)C98)C6(C)CC5O)OC4CO)C(O)C(O)C1O	85.3	1071.00439:6 1071.00903:6 1071.02295:23 1071.0321:18 1071.03674:12 1071.04602:6 1071.42957:6 1071.43408:6 1071.45264:12 1071.46191:6 1071.46643:29 1071.47107:47 1071.47571:76 1071.48035:82 1071.48499:170 1071.48962:205 1071.49426:311 1071.49878:264 1071.50342:358 1071.50806:258 1071.5127:258 1071.51733:123 1071.52197:106 1071.52661:64 1071.53113:82 1071.53577:12 1071.54041:23 1071.54504:18 1071.5…	136.07535:3 234.35185:3 235.06128:3 263.9711:3 294.12354:3 301.07434:3 312.58554:3 327.22272:3 385.11209:3 390.07339:3 416.30048:3 417.32083:3 427.28351:3 532.51025:3 533.3642:3 534.34277:3 566.27258:3 577.35913:3 577.36591:3 577.37274:3 579.34534:3 594.04944:3 597.30219:3 617.34528:3 675.0686:3 723.40668:3 725.43579:3 729.08698:3 732.45697:3 741.85187:3 794.42883:3 834.8255:3 850.44348:3 858.921…
P-Coumaric acid	5.18332	163.041	1800.25	36433.3	[M-H]-	163.04	C9H8O3	Hydroxycinnamic acids	NGSWKAQJJWESNS-UHFFFAOYSA-N	O=C(O)C=CC1=CC=C(O)C=C1	85	162.82977:8 162.83878:8 163.01721:8 163.02261:8 163.03163:8 163.03343:56 163.03523:167 163.03705:198 163.03885:405 163.04065:500 163.04245:198 163.04425:151 163.04605:87 163.04787:71 163.04967:48 163.05147:87 163.05687:8 163.05869:16 163.06409:16 163.0731:8 163.40866:8 163.41948:8 163.86383:8 163.86743:8 163.87466:8 164.03558:8 164.03738:24 164.041:24 164.04282:48 164.04462:16 164.04643:16 164.04…	119.05044:10
(2S,3R,4R,5R,6R)-2-(((2S,3R,4R,5R,6R)-4,5-dihydroxy-2-(((2'R,5'S,6aR,8aS,9S)-4-hydroxy-5',6a,8a,9-tetramethyl-1,3,3',4,4',5,5',6,6a,6b,6',7,8,8a,8b,9,11a,12,12a,12b-icosahydrospiro[naphtho[2',1':4,5]indeno[2,1-b]furan-10,2'-pyran]-6-yl)oxy)-6-(hydroxymethyl)tetrahydro-2H-pyran-3-yl)oxy)-6-methyltetrahydro-2H-pyran-3,4,5-triol	7.59837	739.401	1519.06	35446.3	[M+H]+	739.42	C39H62O13	Steroidal saponins	GHUUTEXYFBCKSM-UYXGSHOPSA-N	OCC1OC(OC2CC(O)CC3=CCC4C(CCC5(C)C4CC6OC7(OCC(C)CC7)C(C)C65)C32C)C(OC8OC(C)C(O)C(O)C8O)C(O)C1O	67.2	739.39294:405 739.40063:1012 739.40448:607 739.40833:405 739.41602:405 739.41986:202 740.38757:202 740.3952:202 740.76019:202 741.41742:202 743.2829:202	103.0379:1 105.06266:1 105.06844:1 107.08082:1 109.05477:1 109.06215:1 109.07394:1 109.10196:1 109.10343:1 109.5847:1 110.42428:1 111.04379:1 115.06967:1 115.07118:1 115.0727:2 115.07573:1 115.07724:2 115.07876:2 115.08027:1 117.07436:1 118.75149:1 121.09372:1 121.09527:1 121.10149:1 121.11236:1 123.01998:1 123.0795:1 123.08419:1 127.03266:1 127.04061:2 127.0438:1 129.01183:1 129.05191:1 129.0535…
Gelsemine	5.82828	321.153	2553.88	33456.8	[M-H]-	321.161	C20H22N2O2	Gelsemium alkaloids	NFYYATWFXNPTRM-UHFFFAOYNA-N	CN1CC2(C=C)C3CC4OCC3C1C2C41C(O)=NC2=CC=CC=C12	60.1	320.91522:17 320.93292:17 320.95569:35 321.11255:17 321.11761:17 321.12268:35 321.12521:52 321.12775:35 321.13028:52 321.13278:17 321.13531:52 321.13785:35 321.14038:69 321.14291:173 321.14545:225 321.14798:829 321.15051:1123 321.15305:1226 321.15558:1192 321.15811:1036 321.16064:553 321.16315:397 321.16568:276 321.16821:121 321.17075:86 321.17328:35 321.17581:35 321.64413:17 322.03421:17 322.039…	119.03502:5 119.03656:5 119.03809:5 179.06628:5 179.07573:5 187.99342:5 234.00763:5 321.17447:5 1356.76367:5
isorhamnetin-3-O-galactoside-6''-rhamnoside	5.26432	623.186	2360.06	33447.7	[M-H]-	623.162	C28H32O16	Flavonoid-3-O-glycosides	UIDGLYUNOUKLBM-UHFFFAOYNA-N	COC1=C(O)C=CC(=C1)C1=C(OC2OC(COC3OC(C)C(O)C(O)C3O)C(O)C(O)C2O)C(=O)C2=C(O)C=C(O)C=C2O1	66.1	622.8902:31 622.89374:31 623.00647:31 623.01709:62 623.02765:31 623.03821:31 623.07697:31 623.09106:31 623.09814:31 623.10162:62 623.1087:31 623.11224:31 623.11926:31 623.12634:123 623.12982:31 623.13336:93 623.1369:31 623.151:93 623.15454:93 623.15802:62 623.16156:185 623.1651:308 623.16864:308 623.17212:771 623.17566:555 623.1792:648 623.18274:802 623.18622:987 623.18976:678 623.1933:370 623.19…	104.98047:10 140.03523:10 209.14706:10 209.16136:10 241.13268:10 246.076:10 285.0274:10 332.08334:10 337.06821:10 337.08896:10 449.75098:10 451.21051:10 451.21951:10 451.22253:20 451.23151:20 451.23453:10 451.24353:10 451.27353:10 455.20862:10 473.19711:10 473.2002:10 473.21246:10 473.21555:20 473.22476:10 473.23398:10 557.23663:10 620.6015:10 622.5307:10 623.1474:10 623.1756:10 623.18622:10 623.…
(3?,5?,9?,14?,25S)-Spirostan-3-yl 6-deoxy-?-L-mannopyranosyl-(1->4)-[?-D-glucopyranosyl-(1->2)]-?-D-glucopyranoside	8.22698	885.487	2787.56	30771.7	[M-H]-	885.485	C45H74O17		BCUDKRWNGQAFLF-GYMZVKDOSA-N	OCC1OC(OC2C(O)C(OC3OC(C)C(O)C(O)C3O)C(OC2OC4CCC5(C)C(CCC6C5CCC7(C)C6CC8OC9(OCC(C)CC9)C(C)C87)C4)CO)C(O)C(O)C1O	79.9	885.05023:38 885.0838:115 885.23505:38 885.41571:38 885.41992:38 885.44092:38 885.44513:76 885.44934:190 885.45349:345 885.4577:383 885.46191:458 885.46613:535 885.47034:1301 885.47455:1273 885.47876:1039 885.48291:1648 885.48712:2032 885.49133:1572 885.49554:1452 885.49976:1835 885.50397:1066 885.50812:876 885.51233:343 885.51654:305 885.52075:152 885.52496:114 885.52917:38 885.86536:38 885.8947…	885.44684:10 885.45105:10 885.47211:10 885.48047:10 885.50989:10 885.51831:20 885.52252:10 885.52667:20 885.53088:10 886.24121:10 886.26221:10 886.49762:10 890.41193:10 890.55939:10
Fuziline	11.4364	454.282	2693.25	29360.6	[M+H]+	454.28	C24H39NO7	Aconitane-type diterpenoid alkaloids	FPECZWKKKKZPPP-NIYPSSDPSA-N	OC1C2CC3C1C(O)(C(O)C2OC)C4C(OC)C5C6(COC)CN(CC)C4C35C(O)CC6	67.4	453.81531:4 453.8454:4 453.86041:4 453.93561:4 454.11911:8 454.12213:8 454.1853:4 454.21539:12 454.22141:8 454.23343:8 454.23947:8 454.24246:4 454.24548:4 454.24847:4 454.2515:21 454.25452:17 454.25751:34 454.26053:39 454.26352:47 454.26654:56 454.26956:145 454.27255:400 454.27557:959 454.27856:1204 454.28159:1371 454.28458:1026 454.2876:824 454.29062:427 454.29361:199 454.29663:185 454.29962:86 …	103.06793:1 103.0708:1 103.07223:1 103.07366:1 103.08369:1 103.08513:1 106.01112:1 107.08806:1 107.08952:1 109.09305:1 109.09452:2 109.09599:2 109.09747:2 109.09895:5 109.10042:3 109.1019:4 109.10337:2 109.10484:2 109.10632:2 109.1078:2 109.10927:1 109.11074:1 109.11222:1 109.11369:1 109.11517:1 109.15351:1 109.15499:1 109.80495:1 110.07289:1 110.62756:1 110.88757:1 111.03777:1 111.08836:1 111.10…
4-Hydroxyquinoline	6.06877	144.047	2318.44	28242	[M-H]-	144.045	C9H7NO	Hydroquinolones	PMZDQRJGMBOQBF-UHFFFAOYSA-N	O=C1C=CNC2=CC=CC=C12	86.5	143.57785:8 143.58461:8 143.5863:8 143.588:8 143.59476:8 143.59645:15 143.78264:8 143.78433:8 143.80296:8 143.81142:8 143.8165:8 143.9232:15 143.93336:8 144.01639:8 144.01978:31 144.03333:8 144.03502:15 144.03671:8 144.03841:46 144.0401:139 144.04179:375 144.0435:493 144.0452:735 144.04689:822 144.04858:415 144.05028:219 144.05197:163 144.05367:109 144.05536:70 144.05705:39 144.05875:23 144.06044…	144.04475:10 792.88464:10
3-(Methylsulfinyl)propylglucosinolate	5.30448	422.013	1862.06	27795.5	[M-H]-	422.025	C11H21NO10S3	Alkylglucosinolates	PHYYADMVYQURSX-WWFIZPDBSA-N	CS(=O)CCC\C(S[C@@H]1O[C@H](CO)[C@@H](O)[C@H](O)[C@H]1O)=N/OS(O)(=O)=O	60.8	421.91714:34 421.92294:34 421.99255:34 421.99545:34 421.99835:34 422.00998:103 422.01288:551 422.01578:241 422.01868:379 422.02158:551 422.02448:517 422.02737:551 422.03027:379 422.03317:172 422.03607:103 422.04187:69 422.04477:34 422.05347:34 422.05637:34 422.0593:34 422.06219:34 422.09119:34 422.09988:34 422.10278:34 422.12311:34 422.13181:103 422.1405:69 422.1434:34 422.1521:34 422.15503:34 42…	193.10565:10 237.11061:10 243.02429:10 303.08661:10 358.12427:10 422.03925:10
Aconine	10.9006	500.26	2032.19	26991	[M+H]+	500.28	C25H41NO9	Aconitane-type diterpenoid alkaloids	SQMGCPHFHQGPIF-YIGCTVLISA-N	OC1CC(OC)C23C4N(CC)CC1(COC)C3C(OC)C4C5(O)C(O)C(OC)C6(O)CC2C5C6O	67.2	499.88431:4 499.91904:4 500.09265:4 500.12424:8 500.12738:4 500.14948:8 500.22211:4 500.22842:41 500.23157:8 500.23474:46 500.23788:58 500.24106:26 500.2442:84 500.24734:123 500.25052:277 500.25366:462 500.25684:671 500.25998:898 500.26315:733 500.2663:816 500.26947:565 500.27261:378 500.27579:246 500.27893:89 500.2821:85 500.28525:51 500.28842:26 500.29156:13 500.29474:9 500.29788:13 500.31366:4…	109.09435:3 109.09878:3 109.10025:3 109.10173:3 109.1032:3 111.0748:3 111.11944:3 120.95527:3 120.95682:8 120.95837:3 120.95992:13 120.96148:5 120.96303:13 120.96458:20 120.96613:13 120.96769:8 120.96925:5 120.97546:3 123.07301:3 123.1153:3 123.11687:3 123.12313:3 124.98175:3 133.09238:3 133.09727:3 133.81816:3 137.13252:3 144.60181:3 145.99727:3 147.10989:3 147.11674:3 147.51086:3 148.47437:3 14…
Salidroside	11.4763	301.134	1284.44	25307.2	[M+H]+	301.12	C14H20O7	O-glycosyl compounds	ILRCGYURZSFMEG-RKQHYHRCSA-N	OC1=CC=C(C=C1)CCOC2OC(CO)C(O)C(O)C2O	80.5	300.72287:4 300.73999:4 300.83548:4 300.97998:4 301.11469:4 301.1196:13 301.12204:18 301.12451:44 301.12695:116 301.12939:129 301.13184:209 301.13431:222 301.13675:209 301.13919:102 301.14166:89 301.1441:53 301.14655:27 301.14899:31 301.15146:18 301.1539:13 301.15634:22 301.15878:13 301.16125:4 301.17105:4 301.40875:4 301.86481:4 301.95065:4 302.01199:4 302.04633:4 302.12241:4 302.12976:13 302.13…	105.06558:2 149.0928:2 151.71587:2 161.12245:2 175.13443:2 197.15448:2 201.04898:2 202.16954:2 218.96719:2 240.91502:2 245.06555:2 252.98096:2 255.13673:2 255.14575:2 255.14801:6 255.15251:2 255.15477:6 255.16153:4 255.16605:2 255.17958:4 255.6218:2 258.04724:2 264.18161:2 267.01624:2 267.55402:2 283.04559:2 283.05035:2 300.15335:2 300.17047:2 300.18515:2 300.19003:2 300.69659:2 300.88513:2 300.9…
(4S,5Z,6S)-4-(2-methoxy-2-oxoethyl)-5-[2-[(E)-3-phenylprop-2-enoyl]oxyethylidene]-6-[(2S,3R,4S,5S,6R)-3,4,5-trihydroxy-6-(hydroxymethyl)oxan-2-yl]oxy-4H-pyran-3-carboxylic acid	10.805	233.154	1196.25	25161	[M-H]-	233.155	C15H22O2	Eremophilane, 8,9-secoeremophilane and furoeremophilane sesquiterpenoids	FMWJHXDPCQWVEJ-JVLSTEMRSA-N	O=C(O)C(=C)C1CC=C2CCCC(C)C2(C)C1	75.7	232.98369:94 232.98584:47 232.98799:47 233.00523:47 233.07422:47 233.08931:47 233.12164:47 233.13242:47 233.1432:47 233.14536:141 233.14967:423 233.15182:470 233.15398:517 233.15614:188 233.15829:470 233.16045:94 233.1626:94 233.16476:188 233.16692:141 233.17123:47 233.17339:47 233.27689:47 233.3459:47 234.02798:47 234.06039:47 234.15114:47 234.15329:94 234.15546:94 234.15977:94 234.16841:47 234.…	167.47887:10 167.48253:10 233.15546:10 233.16408:20
Arabinofuranosyluracil	5.26432	243.034	1546.12	24024.8	[M-H]-	243.072	C9H12N2O6	Pyrimidine nucleosides	DRTQHJPVMGBUCF-UHFFFAOYSA-N	O=C1N=C(O)C=CN1C2OC(CO)C(O)C2O	66.6	242.65083:31 242.78722:31 242.80261:31 243.02049:31 243.02269:31 243.02489:247 243.02708:339 243.0293:370 243.03149:339 243.03369:432 243.03589:216 243.0381:278 243.0403:62 243.0425:31 243.0491:31 243.74742:31 244.0054:31 244.01865:31 244.03407:123 244.03629:93 244.0385:31 244.0407:31 244.04291:31 244.04732:31 244.04951:31 244.06055:31 244.151:31 244.15762:31 244.16866:62 245.12715:31 245.35048:3…	148.9752:10
Karacoline	8.21827	400.219	1971.25	23818.4	[M+Na]+	400.24	C22H35NO4	Aconitane-type diterpenoid alkaloids	HKQZUYOVMYOFIT-JEJCSOMWSA-N	OC1CCC2(C)CN(CC)C3C4CC2C13C5CC6C(O)C5C4(O)CC6OC	77.1	399.8721:4 399.87775:4 399.88623:4 399.91727:8 400.17139:4 400.17987:8 400.18271:8 400.18835:17 400.194:16 400.19681:21 400.19965:38 400.20245:29 400.20529:50 400.2081:76 400.21094:232 400.21378:460 400.21658:748 400.21942:1029 400.22223:854 400.22507:669 400.22787:397 400.23071:206 400.23352:122 400.23636:110 400.23917:80 400.242:38 400.24484:34 400.24765:8 400.2533:4 400.25613:4 400.26178:4 400…	105.48816:1 113.02338:1 120.40919:1 120.98307:1 121.0918:1 124.11818:1 126.04765:1 135.08833:1 141.18761:1 142.06969:1 143.01529:1 143.02542:3 143.0271:4 143.02879:1 143.03049:1 143.03555:3 143.03723:1 143.03893:1 143.04062:3 143.0423:1 154.64574:1 160.90532:1 166.03879:3 166.0406:1 166.04607:1 166.06244:1 167.0153:1 167.02625:1 167.0372:1 167.04268:1 167.73677:1 170.04486:1 174.18066:1 175.1042:…
Dihydrohesperetin-7-O-neohesperidoside	5.46563	611.2	1281.94	18937.6	[M-H]-	611.198	C28H36O15	Flavonoid O-glycosides	ITVGXXMINPYUHD-UHFFFAOYNA-N	COC1=C(O)C=C(CCC(=O)C2=C(O)C=C(OC3OC(CO)C(O)C(O)C3OC3OC(C)C(O)C(O)C3O)C=C2O)C=C1	65.3	611.09491:15 611.10187:15 611.10541:30 611.11932:30 611.12634:30 611.1333:15 611.13678:15 611.1438:30 611.14728:45 611.15771:15 611.16125:15 611.16473:45 611.16821:15 611.17169:45 611.17517:75 611.17871:166 611.18219:166 611.18567:271 611.18915:271 611.19263:392 611.19617:497 611.19965:558 611.20312:497 611.2066:332 611.21008:377 611.21362:121 611.2171:136 611.22058:45 611.22406:90 611.22754:45 6…	262.0755:10 325.15228:10 404.76016:10 440.26746:10 440.59341:10 441.96976:10 442.2637:10 443.37204:10 443.44043:10 444.73785:10 445.43793:10 445.97153:10 535.1347:10 611.18976:10 611.22467:10 611.29449:10 611.32245:10
10-deacetylbaccatin III	7.31415	567.242	1525.62	17983.6	[M+Na]+	567.22	C29H36O10	Taxanes and derivatives	YWLXLRUDGLRYDR-ZHPRIASZSA-N	O=C(OC1C2C3(OC(=O)C)COC3CC(O)C2(C(=O)C(O)C4=C(C)C(O)CC1(O)C4(C)C)C)C=5C=CC=CC5	63	567.03687:7 567.18481:7 567.2016:20 567.21844:33 567.2218:40 567.22516:73 567.22852:140 567.23187:227 567.23523:396 567.23859:723 567.24194:1089 567.24536:975 567.24872:750 567.25208:576 567.25543:263 567.25879:241 567.26215:207 567.2655:54 567.26886:73 567.27222:47 567.27557:27 567.27893:13 567.28235:13 567.29913:7 567.30585:7 567.37646:7 567.57489:7 567.63544:7 567.64215:7 567.72961:7 567.7666:…	103.06086:2 103.0666:2 103.06946:2 110.05669:2 117.05759:2 117.06523:2 117.68316:2 117.68623:2 117.68929:2 118.05255:2 118.05715:2 118.06175:2 118.06482:2 118.06789:2 118.07249:2 118.25665:2 118.53931:2 118.56083:2 121.48246:2 121.635:2 127.0518:2 127.05338:2 128.50084:2 130.05467:2 130.05791:5 130.05951:5 130.06113:7 130.06273:9 130.06435:10 130.06595:7 130.06757:2 130.07401:3 130.07883:2 130.08…
(2S,3R,4R,5R,6S)-2-[(2R,3S,4R,5R,6R)-4,5-dihydroxy-2-(hydroxymethyl)-6-[[7-[2-hydroxy-1-[3,4,5-trihydroxy-6-(hydroxymethyl)oxan-2-yl]oxyethyl]-1,1,4a,7-tetramethyl-3,4,4b,5,6,8,10,10a-octahydro-2H-phenanthren-2-yl]oxy]oxan-3-yl]oxy-6-methyloxane-3,4,5-triol	8.46813	791.429	1545.38	17918.4	[M-H]-	791.407	C38H64O17		IYTSQVVPSDQONH-BINIWEQPSA-N	OCC1OC(OC(CO)C2(C)CC3=CCC4C(C)(C)C(OC5OC(CO)C(OC6OC(C)C(O)C(O)C6O)C(O)C5O)CCC4(C)C3CC2)C(O)C(O)C1O	83.8	791.1156:35 791.21094:35 791.27051:35 791.30231:35 791.33801:35 791.37378:105 791.38971:70 791.39368:70 791.39764:140 791.40161:35 791.40558:105 791.40955:209 791.41351:279 791.41748:244 791.42145:454 791.42542:663 791.42938:1396 791.43335:1012 791.43732:1082 791.44135:1256 791.44531:1012 791.44928:733 791.45325:628 791.45721:558 791.46118:454 791.46515:140 791.46912:70 791.47308:70 791.47705:35 …	705.32794:10 791.42731:10 791.4472:10 791.45117:20 791.46307:20 791.47101:10 791.48694:10 791.49487:20 791.50677:10 791.61401:10 792.55194:10 952.56165:10 1309.61633:10 1475.50208:10
9,12,15-Octadecatrienoic acid, 3-(hexopyranosyloxy)-2-hydroxypropyl ester, (9Z,12Z,15Z)-	10.9257	559.315	1286.44	17433.5	[M+FA-H]-	559.312	C27H46O9	Glycosylmonoacylglycerols	HUSISCNTLUEZCN-PDBXOOCHSA-N	O=C(OCC(O)COC1OC(CO)C(O)C(O)C1O)CCCCCCCC=CCC=CCC=CCC	61.5	558.92804:28 558.93805:28 558.94141:28 558.94806:139 558.95142:28 558.95477:111 558.95807:195 558.96143:222 558.96478:222 558.96808:362 558.97144:612 558.97479:473 558.97809:584 558.98145:834 558.9848:834 558.9881:640 558.99146:250 558.99481:362 558.99817:306 559.00146:222 559.00482:111 559.00818:56 559.01147:28 559.01819:28 559.02484:83 559.18848:28 559.19513:28 559.2619:28 559.27863:56 559.2852…	134.99699:10 231.93437:10 243.00069:10 243.00508:10 253.09683:10 277.22238:10 277.23178:10 277.23413:10 286.94562:10 316.99765:10 324.9996:10 331.33057:10 352.98361:10 386.0029:10 402.98386:10 432.97974:10 452.98291:10 454.97763:10 455.00473:10 455.98718:10 468.97479:10 472.96161:10 473.01382:10 474.97827:10 474.98752:10 513.31305:10 513.32587:10 538.9931:10 539.00293:10 559.00244:10
(1S,3R,6S,6aR,6bR,8S,9S,11R,11aR,12R,12aR,14R)-1-ethyl-6,8,11-trihydroxy-3-methyl-10-methylenetetradecahydro-3,6a,12-(epiethane[1,1,2]triyl)-9,11a-methanoazuleno[2,1-b]azocine 1-oxide	9.28688	376.25	1792.5	16315.6	[M+H]+	376.25	C22H33NO4	Kaurane diterpenoids	DEMQJEXKIJFBRD-HQOPBMQXSA-N	[O-][N+]1(CC)CC2(C)CCC(O)C34C2CC(C31)C56CC(C(=C)C5O)C(O)CC64	79.3	376.03891:4 376.04437:4 376.21411:4 376.2196:16 376.22507:8 376.22781:16 376.23056:33 376.23331:4 376.23602:38 376.23877:150 376.24152:227 376.24426:470 376.24698:729 376.24973:836 376.25247:690 376.25519:537 376.25793:395 376.26068:278 376.26343:172 376.26614:59 376.26889:51 376.27164:38 376.27438:33 376.2771:8 376.28806:4 376.31271:4 377.03058:4 377.12653:4 377.22522:17 377.23346:4 377.23621:16…	102.08001:1 102.08429:1 102.08857:2 102.09:2 102.09142:1 102.09427:1 102.09855:1 102.45692:1 102.75724:1 104.04065:1 107.05603:1 107.05749:1 107.05894:1 107.96214:1 107.97241:1 108.03697:1 108.0399:2 108.04137:1 108.0443:3 108.04724:1 108.05018:1 108.05312:1 108.05605:1 108.05752:1 108.05898:1 109.02828:1 117.36024:1 120.53513:1 124.08086:3 124.08715:2 124.09029:1 124.09187:1 124.09973:1 125.0593…
14-hydroxy-3-((5-hydroxy-4-methoxy-6-methyltetrahydro-2H-pyran-2-yl)oxy)-10,13-dimethyl-17-(5-oxo-2,5-dihydrofuran-3-yl)hexadecahydro-1H-cyclopenta[a]phenanthren-16-yl acetate	10.5433	577.354	1796.25	15128.6	[M+H]+	577.33	C32H48O9	Cardenolide glycosides and derivatives	JLPDBLFIVFSOCC-UHFFFAOYSA-N	O=C1OCC(=C1)C2C(OC(=O)C)CC3(O)C4CCC5CC(OC6OC(C)C(O)C(OC)C6)CCC5(C)C4CCC23C	66.3	576.87921:4 576.88599:4 577.30652:4 577.30994:4 577.31329:12 577.32007:25 577.32349:33 577.3269:26 577.33026:29 577.33368:60 577.33704:102 577.34045:162 577.34381:158 577.34723:413 577.35065:652 577.354:886 577.35742:843 577.36078:695 577.3642:716 577.36755:487 577.37097:278 577.37439:183 577.37775:149 577.38116:89 577.38452:51 577.38794:38 577.39136:38 577.39471:4 577.39813:4 577.40491:4 577.408…	103.05587:5 105.06345:5 105.06634:5 105.06779:5 107.0787:5 107.08308:5 107.08454:5 107.08893:5 107.09039:10 108.35346:5 109.02463:5 109.02905:10 109.03348:5 109.0379:5 109.09393:5 109.0954:5 109.09687:5 109.09982:10 109.1013:5 109.10278:5 109.10425:5 109.11015:5 109.24143:5 115.0372:5 115.04932:5 115.07052:5 115.07204:5 115.07355:5 115.07658:5 115.07809:5 115.08112:5 117.06758:5 117.07674:5 119.0…
Gracillin	7.79963	907.438	1016.31	13040.8	[M+Na]+	907.46	C45H72O17	Steroidal saponins	YQEMAEKYNNOCBY-IEMDQPGHSA-N	OCC1OC(OC2C(O)C(OC(OC3CC4=CCC5C(CCC6(C)C5CC7OC8(OCC(C)CC8)C(C)C76)C4(C)CC3)C2OC9OC(C)C(O)C(O)C9O)CO)C(O)C(O)C1O	79.7	906.97485:19 907.00464:19 907.28101:19 907.41284:19 907.42133:77 907.4256:134 907.42981:77 907.43408:173 907.43835:288 907.44257:288 907.44684:134 907.45111:77 907.45538:154 907.45959:115 907.46387:134 907.47235:77 907.49786:19 907.50214:19 907.52338:19 907.53613:38 907.64673:19 907.953:19 907.96576:19 908.4082:19 908.41675:19 908.42523:19 908.4295:96 908.43378:38 908.43799:96 908.44226:115 908.4…	114.60982:2 132.26657:2 148.0638:2 173.54446:2 185.36508:2 230.25887:2 231.06506:2 237.94424:2 241.20674:2 259.19855:2 277.20947:2 290.72879:2 293.13373:2 293.1434:2 307.08084:2 321.0788:2 347.09024:2 371.13596:2 383.3129:2 401.32581:2 401.33148:2 401.34561:2 402.33331:2 402.34464:2 417.34344:2 419.15665:2 419.24338:2 419.33298:2 419.37924:2 419.78989:2 420.33389:2 420.34546:2 424.28247:2 427.148…
(1S,2R,4aS,6aR,6bR,10S,12aR,14bS)-1,2,6b,9,9,12a-hexamethyl-10-[(2R,3R,4S,5S,6R)-3,4,5-trihydroxy-6-methyloxan-2-yl]oxy-2,3,4,5,6,6a,7,8,8a,10,11,12,13,14b-tetradecahydro-1H-picene-4a,6a-dicarboxylic acid	8.64492	633.381	1361.12	12656.2	[M+H]+	633.397	C36H56O9		PUOQHFWXBKTHST-MPLMROMBSA-N	O=C(O)C12C(=CCC3C4(C)CCC(OC5OC(C)C(O)C(O)C5O)C(C)(C)C4CCC31C)C6C(C)C(C)CCC6(C(=O)O)CC2	84.4	633.14624:4 633.15686:8 633.17462:8 633.18176:8 633.22083:4 633.22437:4 633.30609:4 633.32031:4 633.32385:4 633.33453:12 633.33807:4 633.34515:12 633.34869:29 633.35229:25 633.35583:46 633.35938:70 633.36292:142 633.36646:290 633.37006:395 633.3736:493 633.37714:617 633.38068:664 633.38422:657 633.38782:459 633.39136:274 633.3949:138 633.39844:110 633.40204:76 633.40558:68 633.40912:29 633.41266:…	175.14333:3 197.01135:3 212.07558:3 246.64574:3 274.00735:3 295.22293:3 301.13467:3 339.29593:3 358.85281:3 404.40558:3 433.14798:3 435.31912:3 485.13223:3 593.42944:3 596.34601:3 603.85083:3 615.26263:3 615.33966:3 623.76288:3 625.53772:3 631.27814:3 631.28522:3 631.2923:3 631.29584:3 631.30292:3 631.30652:7 631.31006:3 631.31714:3 631.32068:7 631.32422:7 631.36682:7 631.3739:3 631.38452:7 631.4…
(1'R,2S,4'S,5S,6R,8'R,10'E,12'S,13'S,14'E,16'E,20'R,21'R,24'S)-6-(butan-2-yl)-21',24'-dihydroxy-12'-{[(2R,4S,5S,6S)-5-{[(2S,4S,5S,6S)-5-hydroxy-4-methoxy-6-methyloxan-2-yl]oxy}-4-methoxy-6-methyloxan-2-yl]oxy}-5,11',13',22'-tetramethyl-5,6-dihydro-3',...	8.42898	895.469	1233.75	11200.7	[M+Na]+	895.48	C48H72O14	Macrolides and analogues	RRZXIRBKKLTSOM-VDYLCOMISA-N	O=C1OC2CC(OC3(OC(C(C=C3)C)C(C)CC)C2)CC=C(C)C(OC4OC(C)C(OC5OC(C)C(O)C(OC)C5)C(OC)C4)C(C=CC=C6COC7C(O)C(=CC1C67O)C)C	77.2	894.97064:4 895.16498:4 895.19873:4 895.22833:4 895.25787:4 895.35925:4 895.36346:8 895.42261:12 895.42688:8 895.4353:8 895.43951:12 895.44373:20 895.448:33 895.45221:58 895.45642:132 895.46063:217 895.46484:377 895.46912:403 895.47333:341 895.47754:367 895.48175:288 895.48602:206 895.49023:160 895.49445:99 895.49866:49 895.50287:62 895.50714:12 895.51135:28 895.51556:16 895.51978:4 895.53668:8 8…	139.05226:1 143.42795:1 190.08472:1 226.0748:1 239.08888:1 240.08098:1 254.18387:1 257.02106:1 261.03143:1 263.16391:1 265.07285:1 267.20789:1 272.1857:1 272.20432:1 278.90207:1 279.18979:1 286.21121:1 289.07971:1 293.11917:1 297.24265:3 299.94568:1 311.11417:1 323.20724:1 323.22247:1 377.26971:1 378.31796:1 398.30801:1 409.27539:1 409.88397:1 410.24704:1 413.30096:1 413.32394:1 414.29752:1 414.9…
LPC 18:3	10.3315	518.311	1124.5	10906.4	[M+H]+	518.324	C26H48NO7P	Lipids	WKQNRCYKYCKESD-UHFFFAOYNA-N	O=C(OCC(O)COP(=O)([O-])OCC[N+](C)(C)C)CCCCCCCC=CCC=CCC=CCC	80.9	518.06677:4 518.07642:4 518.11816:4 518.12781:4 518.13428:4 518.14069:4 518.14709:4 518.25317:4 518.25958:4 518.27246:4 518.27563:4 518.27887:16 518.2821:12 518.28528:8 518.28851:29 518.29175:37 518.29492:82 518.29816:160 518.30139:217 518.30457:332 518.3078:403 518.31104:500 518.31421:469 518.31744:352 518.32068:217 518.32385:185 518.32709:106 518.33032:49 518.3335:24 518.33673:8 518.34314:16 51…	103.77108:3 103.83581:3 103.83868:3 103.84013:3 103.89192:3 104.0978:7 104.09924:14 104.10069:17 104.10212:65 104.10356:78 104.105:78 104.10645:92 104.10789:95 104.10933:24 104.11076:20 104.11221:31 104.11365:17 104.11509:7 104.11653:3 104.11797:7 104.11941:10 104.12085:3 104.12229:7 104.12373:3 104.12949:7 104.1367:7 104.36012:3 104.37022:3 104.57224:3 104.6069:3 104.62422:3 104.65311:3 104.7137…
N-isopentyl-2-(3,4,9-trimethyl-7-oxo-7H-furo[2,3-f]chromen-8-yl)acetamide	6.6179	378.172	1211.31	10328.8	[M+Na]+	378.17	C21H25NO4	Angular furanocoumarins	NXIXJPLNNMLKRR-UHFFFAOYSA-N	O=C1OC2=CC(=C3C(OC=C3C)=C2C(=C1CC(=O)NCCC(C)C)C)C	68.1	378.10886:4 378.1171:8 378.12534:4 378.12808:4 378.1308:4 378.13354:4 378.13629:4 378.14178:4 378.15002:4 378.15277:8 378.15552:16 378.15826:37 378.16101:81 378.16376:130 378.1665:230 378.16925:264 378.172:374 378.17474:321 378.17749:248 378.18024:150 378.18298:85 378.18573:49 378.18848:24 378.19122:16 378.19397:24 378.19672:4 378.19943:4 378.20218:4 378.20493:8 378.20767:8 378.21042:4 378.21591:…	103.05223:2 103.05509:2 103.05796:2 105.06121:2 106.06352:4 107.04576:2 110.05666:2 110.05962:2 110.06555:2 110.07296:2 110.07444:2 112.08464:2 113.04477:2 114.04819:2 114.68079:2 115.05:4 115.05151:4 115.05453:2 115.05605:2 116.04704:2 116.05009:2 117.05145:2 117.05756:2 117.06062:2 117.06367:2 117.0652:2 117.07131:2 117.0759:2 117.07895:2 117.68466:2 118.05252:2 118.0556:6 118.05713:6 118.05866…
(25S)-26-O-β-D- glucopyranosyl -5β- furostane -3β,22α,26- triol -3-O-α-L- glucopyranosyl -(1→4)-[β-D- glucopyranosyl (1→6)]-β-D- xylopyranosyl (1→2)]-β-D- glucopyranoside	8.90912	251.108	228455	2.39622e+06	[M-H]-	251.108	C56H94O28				98.2	250.72531:17 250.74991:17 250.75438:17 250.77003:17 250.85054:17 250.85277:17 250.90869:17 250.91316:17 250.92435:17 250.93105:17 250.93329:17 250.93553:17 250.94894:17 250.95566:17 250.96013:33 250.96237:17 250.97356:17 250.98027:17 250.98697:17 250.98921:67 250.99146:67 250.99368:33 250.99593:17 250.99815:33 251.0004:119 251.00264:17 251.00487:17 251.00934:17 251.01158:17 251.02052:33 251.02501…	117.02979:10 117.03131:10 117.03284:10 117.03742:10 117.04048:10 119.04254:10 119.04871:20 119.05641:10 119.05795:10 120.99945:10 129.07161:10 130.03917:10 130.04723:10 130.66792:10 131.04752:10 131.04913:10 132.05652:31 132.05814:10 133.06287:10 142.04779:10 143.0374:10 143.04755:10 143.05429:10 143.05598:20 143.05936:10 144.05757:10 144.18471:10 145.03714:10 145.07285:10 156.05614:10 156.05789:…
Asparagus cochinchinensis neutral polysaccharide	9.02912	281.118	11692.9	131335	[M-H]-	281.118	C90H152O76				97.9	280.93585:51 280.95953:51 280.96661:102 280.97372:203 280.9761:254 280.97845:559 280.98083:965 280.98318:711 280.98557:660 280.98792:254 280.9903:609 280.99268:102 280.99503:152 280.99976:155 281.00214:103 281.00449:51 281.00687:51 281.04001:51 281.06366:51 281.07077:51 281.07788:51 281.08023:104 281.08972:51 281.09445:51 281.0968:51 281.09918:102 281.10156:152 281.10391:457 281.10629:820 281.108…	108.0334:2 109.02783:4 113.14574:2 115.05376:2 115.06436:4 117.04494:2 117.05258:2 121.02107:2 121.02573:2 130.98921:2 143.05418:2 155.91493:2 159.04071:2 169.0757:2 170.98509:2 172.05585:2 173.05563:2 173.06306:2 193.0627:2 195.0435:2 197.06416:2 199.56372:2 206.07913:2 208.06029:2 210.0816:2 210.09593:2 210.42969:2 211.04054:2 212.04895:2 213.00204:2 214.06058:2 219.04552:2 221.05849:2 222.0631…
(25R)-26-O-β-D-glucopyranosyl -5β- furostane -3β,22α,26- triol -3-O-α-L- rhamnosyl -(1→4)-β-D- glucopyranoside	6.87123	1047.55	10757	258725	[M-H]-	1047.54	C45H76O18				94.4	1047.49084:202 1047.49548:202 1047.5:607 1047.50464:607 1047.50916:405 1047.51379:1417 1047.51831:1417 1047.52283:1012 1047.52747:3644 1047.53198:1417 1047.53662:3644 1047.54114:3441 1047.54578:4251 1047.55029:2227 1047.55493:1619 1047.55945:3644 1047.56396:1215 1047.5686:810 1047.57312:405 1047.57776:607 1047.58228:405 1047.58691:202 1047.59143:202 1047.62341:202 1047.65088:202 1047.68286:202 10…	113.02443:10 119.03196:10 163.05853:10 198.8385:10 247.08759:10 247.09647:10 289.10464:10 622.74628:10 689.42725:10 737.4256:10 755.42609:10 755.44159:10 755.44934:10 755.45325:20 755.45709:10 755.461:10 755.4649:10 755.46875:10 755.48041:10 853.48334:10 883.01135:10 883.49396:10 883.50232:10 883.52332:10 883.52753:10 883.56531:10 885.52655:10 885.54755:10 899.89209:10 901.43457:10 901.43884:10 9…
Diosgenin	10.5433	415.31	4627.94	38732.2	[M+H]+	415.319	C27H42O3				89.1	414.82126:13 414.827:4 414.85574:4 414.90463:4 414.9075:4 414.91327:4 414.9794:4 415.07721:4 415.08008:4 415.10022:4 415.13474:8 415.22101:4 415.24979:4 415.25266:4 415.26129:4 415.26416:8 415.2728:12 415.27567:4 415.27856:4 415.28143:52 415.2843:31 415.28717:44 415.29007:45 415.29294:75 415.29581:160 415.29871:328 415.30157:794 415.30444:1121 415.30731:1608 415.31021:1981 415.31308:1646 415.3159…	102.04366:5 103.05157:5 105.06055:5 105.06345:15 105.0649:5 105.06634:20 105.06779:15 105.06924:10 105.07068:15 105.07358:10 105.07502:5 105.07792:5 105.07937:5 105.50527:5 105.77953:5 106.24905:5 106.41939:5 106.47182:5 107.07578:5 107.07724:15 107.0787:15 107.08016:26 107.08162:20 107.08308:20 107.08454:36 107.08601:26 107.08746:10 107.08893:10 107.09623:5 107.09915:5 107.58038:5 108.00986:5 10…
